# Supplementary material for: Microwave-Assisted Synthesis and Spectral Properties of Pyrrolidine-Fused Chlorin Derivatives
Source: MDPI journal article supplement (doi:10.3390/molecules28093833), 2023-04-30
Supplement: s1 [file s1]

Supporting information for

**Microwave-assisted synthesis and spectral properties of pyrrolidine-fused chlorin derivatives**

José Almeida, Augusto C. Tomé, Maria Rangel, Ana M. G. Silva\*

**Contents**

|                                                                               |    |
|-------------------------------------------------------------------------------|----|
| Structures and corresponding numbers of the <i>N</i> -alkylated chlorins..... | 2  |
| NMR spectra.....                                                              | 4  |
| Mass spectrometry.....                                                        | 21 |
| UV-Vis and fluorescence spectroscopy.....                                     | 26 |

## Structures and corresponding numbers of the *N*-alkylated chlorins

**Table S1.** Structure, number, molecular formula and weight of *N*-alkylated chlorins synthesized.

| Structure                                                                           | M             | Number                                      | Molecular form.                                                               | MW      |
|-------------------------------------------------------------------------------------|---------------|---------------------------------------------|-------------------------------------------------------------------------------|---------|
| 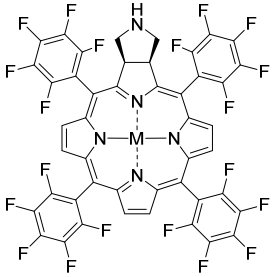   | <b>2H</b>     | <b>1</b>                                    | C <sub>46</sub> H <sub>15</sub> F <sub>20</sub> N <sub>5</sub>                | 1017.63 |
|                                                                                     | <b>Zn(II)</b> | <b>Zn-1</b>                                 | C <sub>46</sub> H <sub>13</sub> F <sub>20</sub> N <sub>5</sub> Zn             | 1080.99 |
|   | <b>2H</b>     | <b>2a, R = OCH<sub>3</sub></b>              | C <sub>55</sub> H <sub>23</sub> F <sub>20</sub> N <sub>5</sub> O <sub>2</sub> | 1199.63 |
|                                                                                     |               | <b>2b, R = OH</b>                           | C <sub>54</sub> H <sub>21</sub> F <sub>20</sub> N <sub>5</sub> O <sub>2</sub> | 1151.76 |
|                                                                                     |               | <b>2c, R = NHC<sub>6</sub>H<sub>5</sub></b> | C <sub>60</sub> H <sub>26</sub> F <sub>20</sub> N <sub>6</sub> O              | 1226.87 |
|  | <b>2H</b>     | <b>3</b>                                    | C <sub>50</sub> H <sub>22</sub> F <sub>20</sub> IN <sub>5</sub>               | 1199.63 |
|                                                                                     | <b>Zn(II)</b> | <b>Zn-3</b>                                 | C <sub>50</sub> H <sub>20</sub> F <sub>20</sub> IN <sub>5</sub> Zn            | 1262.99 |
|  | <b>2H</b>     | <b>4</b>                                    | C <sub>56</sub> H <sub>22</sub> F <sub>20</sub> N <sub>6</sub> O <sub>2</sub> | 1190.80 |

|                                                                                     |           |          |                             |         |
|-------------------------------------------------------------------------------------|-----------|----------|-----------------------------|---------|
| 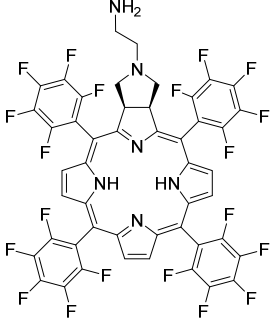   | <b>2H</b> | <b>5</b> | $C_{48}H_{20}F_{20}N_6$     | 1060.70 |
|   | <b>2H</b> | <b>6</b> | $C_{60}H_{31}F_{20}N_7O_2S$ | 1293.98 |
|  | <b>2H</b> | <b>7</b> | $C_{58}H_{26}F_{20}N_6O_2S$ | 1250.91 |

## NMR spectra

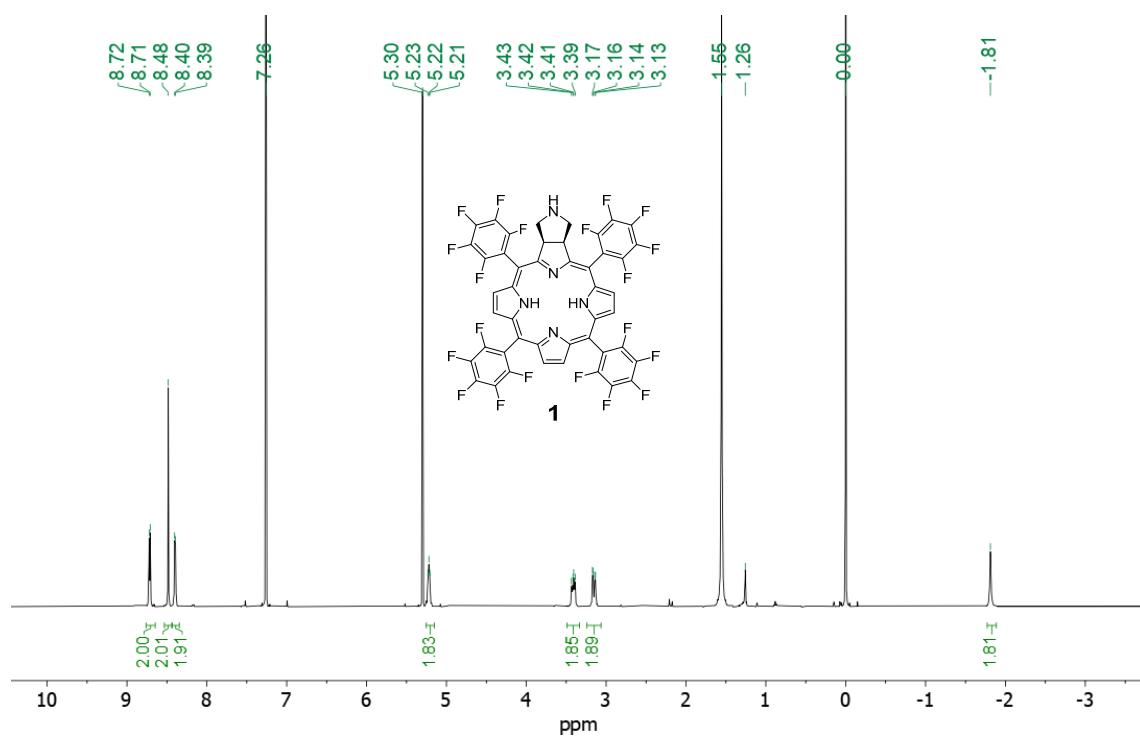

**Figure S 1.**  $^1\text{H}$  NMR spectrum (400.14 MHz,  $\text{CDCl}_3$ ) of **1** (\*dichloromethane).

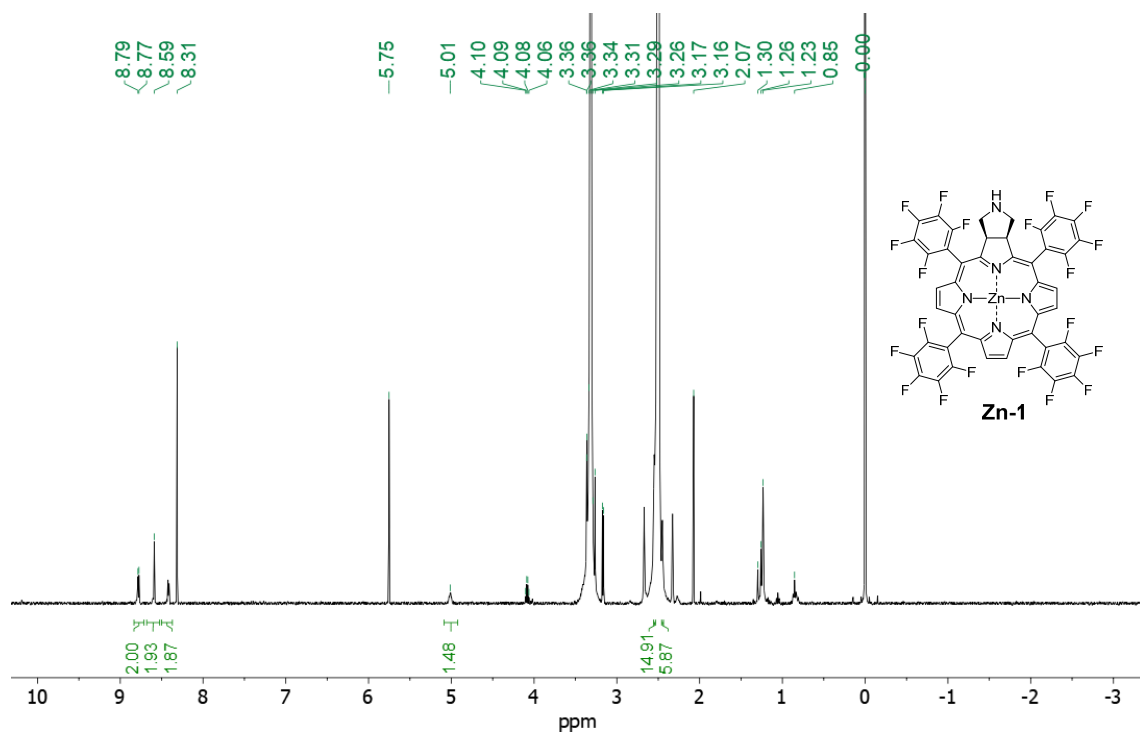

**Figure S 2.**  $^1\text{H}$  NMR spectrum (400.14 MHz,  $\text{DMSO-d}_6$ ) of **Zn-1**.

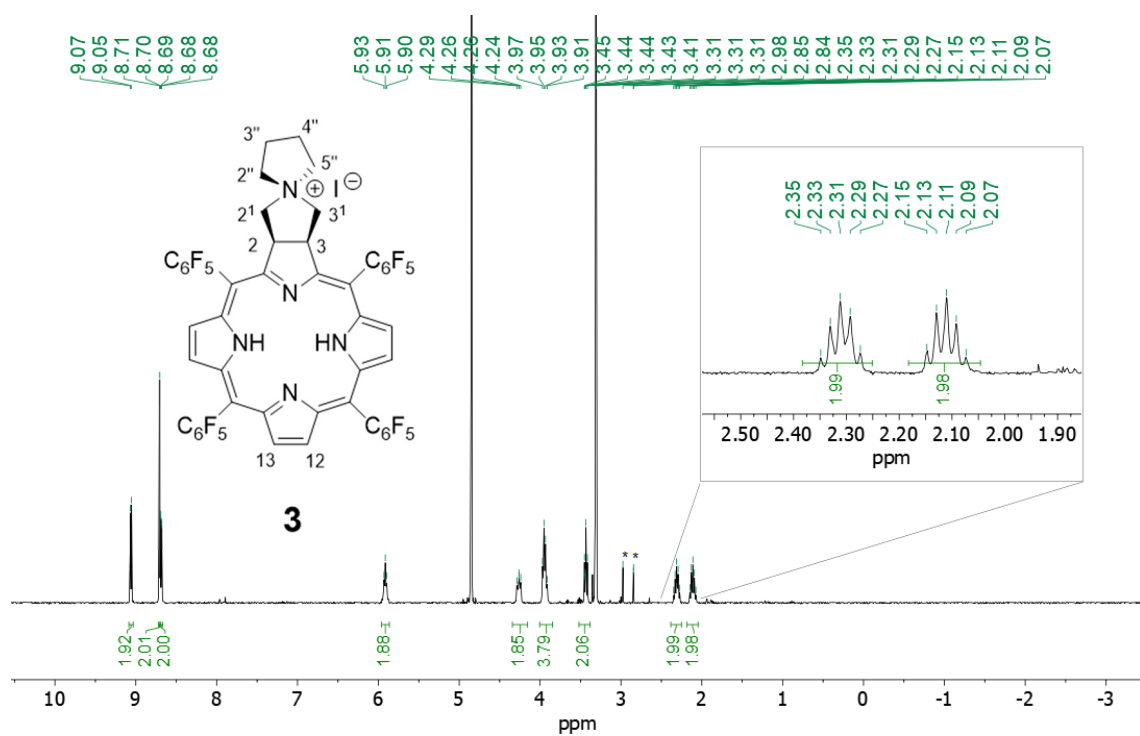

**Figure S 3.** <sup>1</sup>H NMR spectrum (400.14 MHz, CD<sub>3</sub>OD) of **3** (\*solvent impurities).

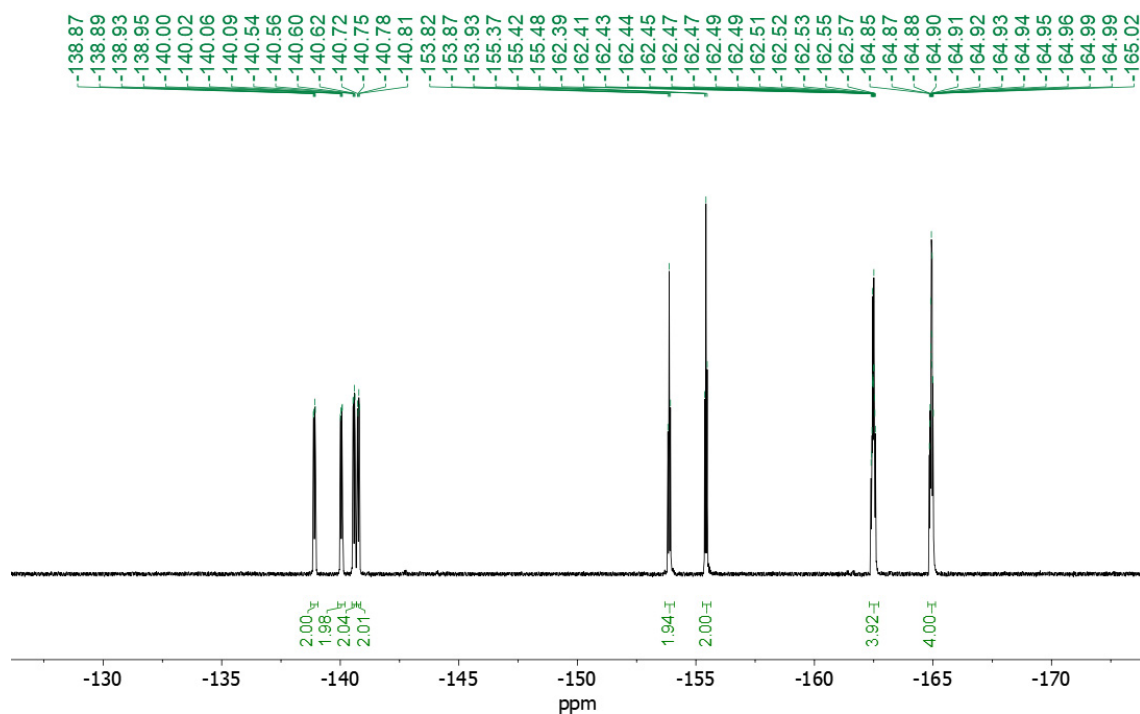

**Figure S 4.** <sup>19</sup>F NMR spectrum (376.48 MHz, CDCl<sub>3</sub>) of **3**.

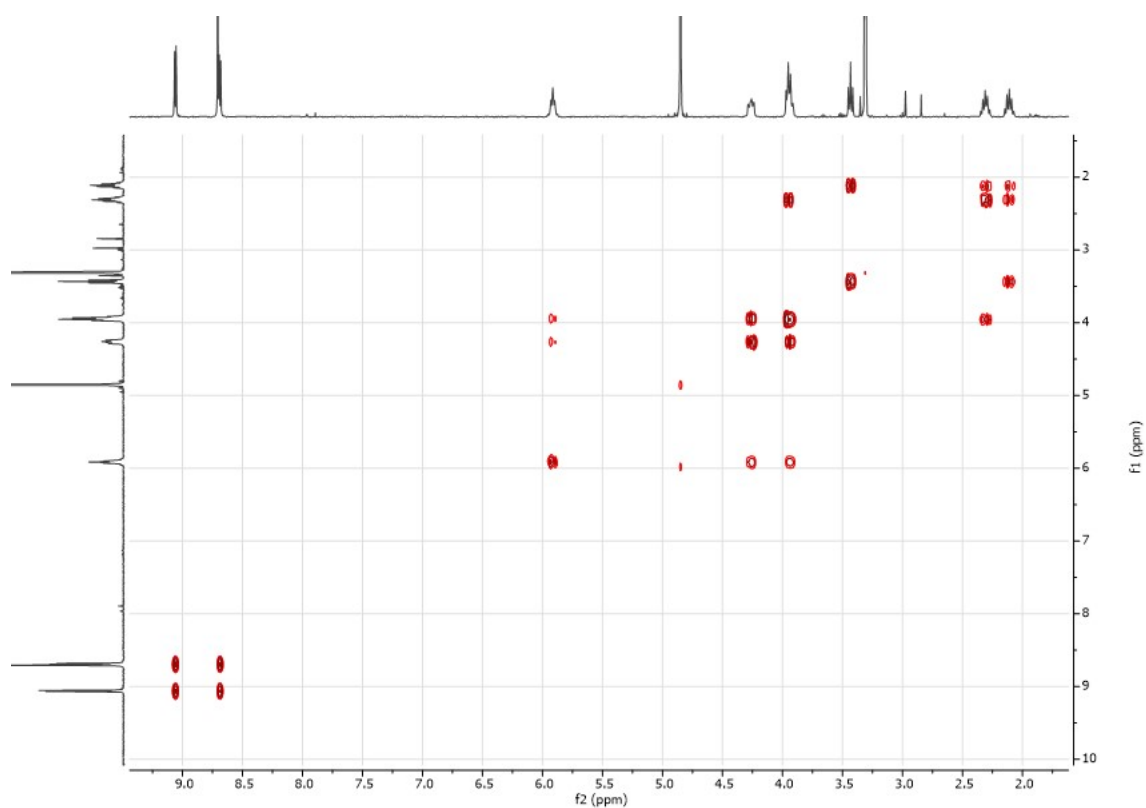

**Figure S 5.** COSY spectrum of **3**.

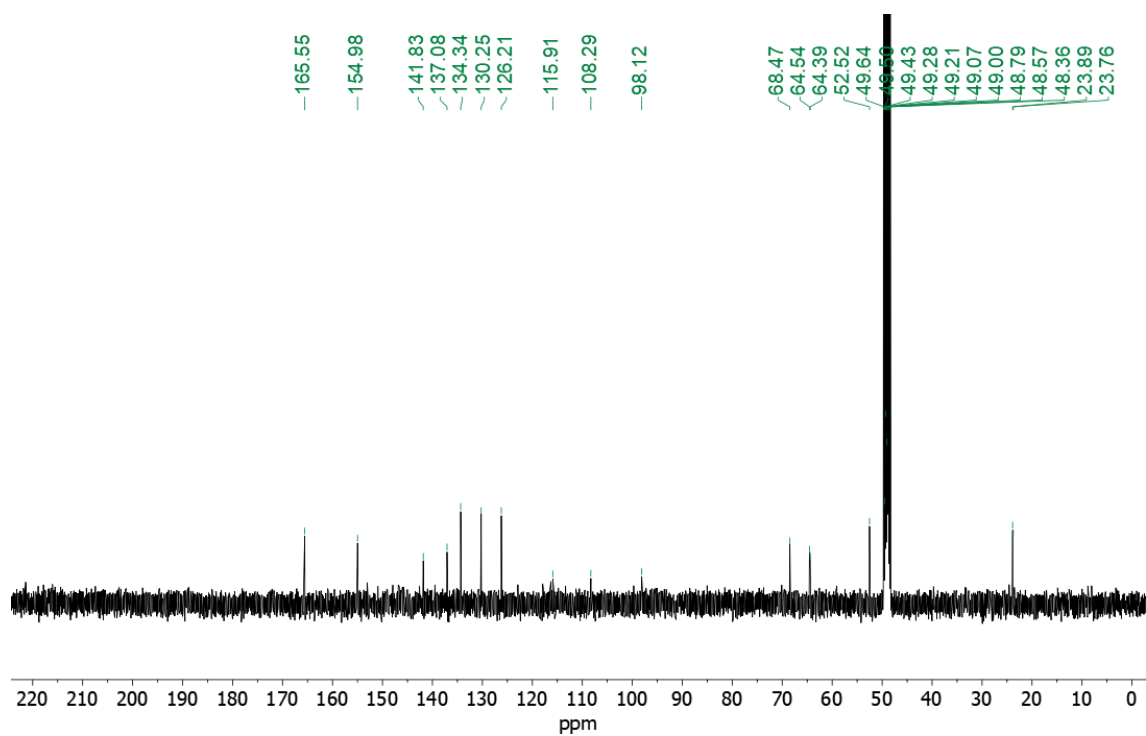

**Figure S 6.**  $^{13}\text{C}$  NMR spectrum (100.62 MHz,  $\text{CD}_3\text{OD}$ ) of **3**.

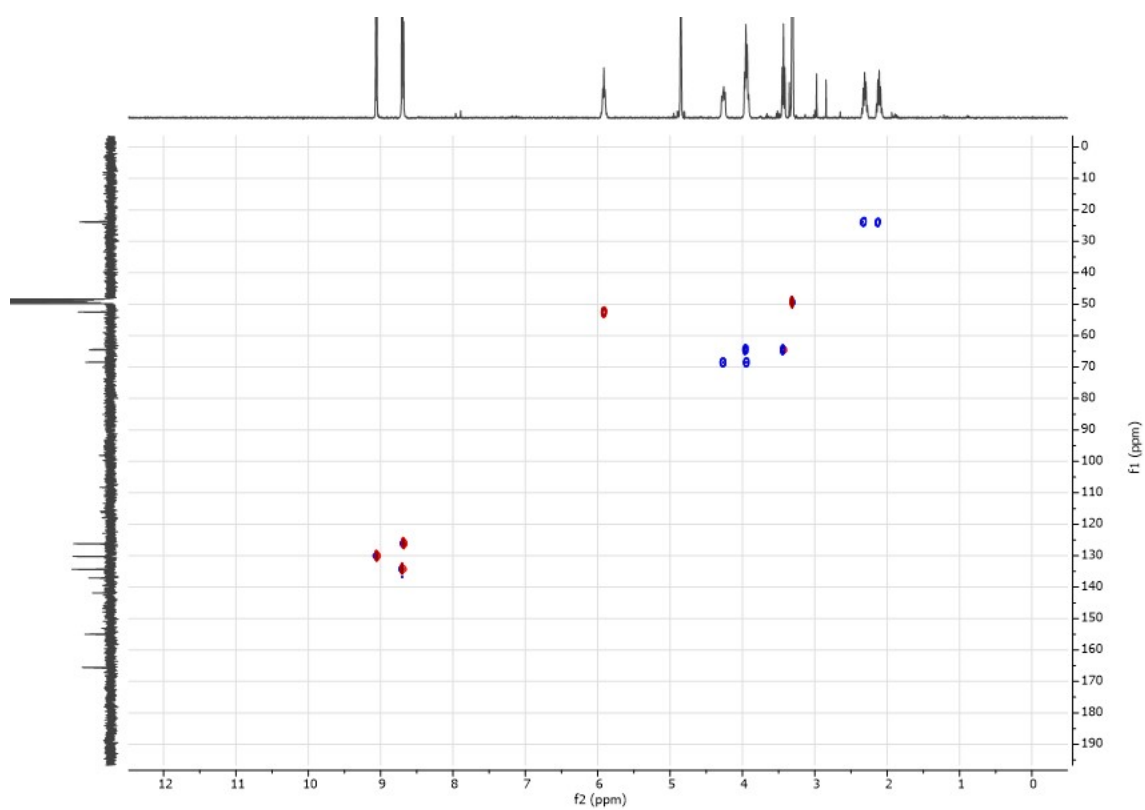

**Figure S 7.** HSQC spectrum of **3**.

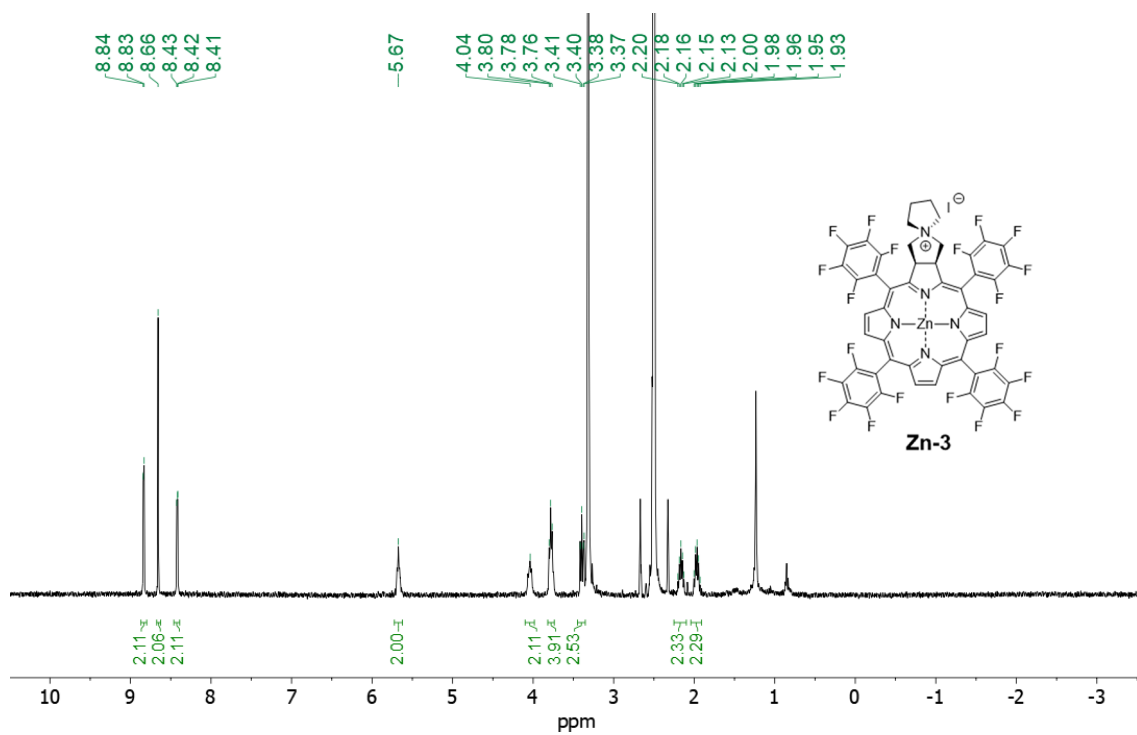

**Figure S 8.**  $^1\text{H}$  NMR spectrum (400.14 MHz,  $\text{CD}_3\text{OD}$ ) of **Zn-3**.

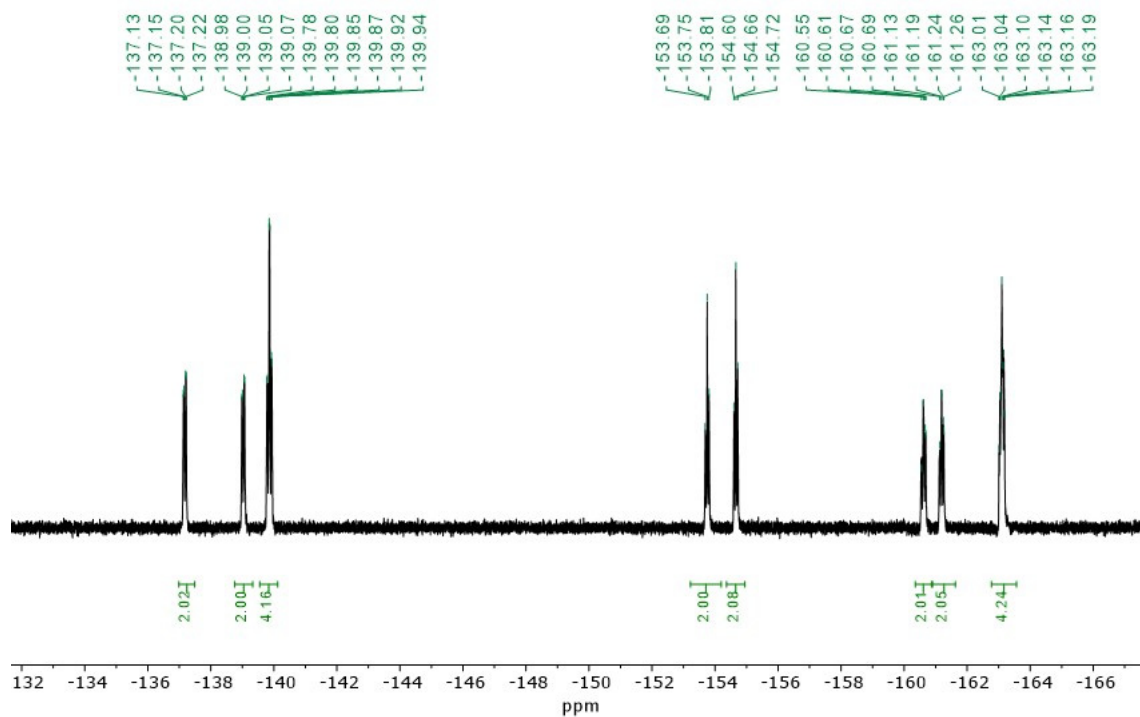

**Figure S 9.**  $^{19}\text{F}$  NMR spectrum (376.48 MHz,  $\text{CD}_3\text{OD}$ ) of **Zn-3**.

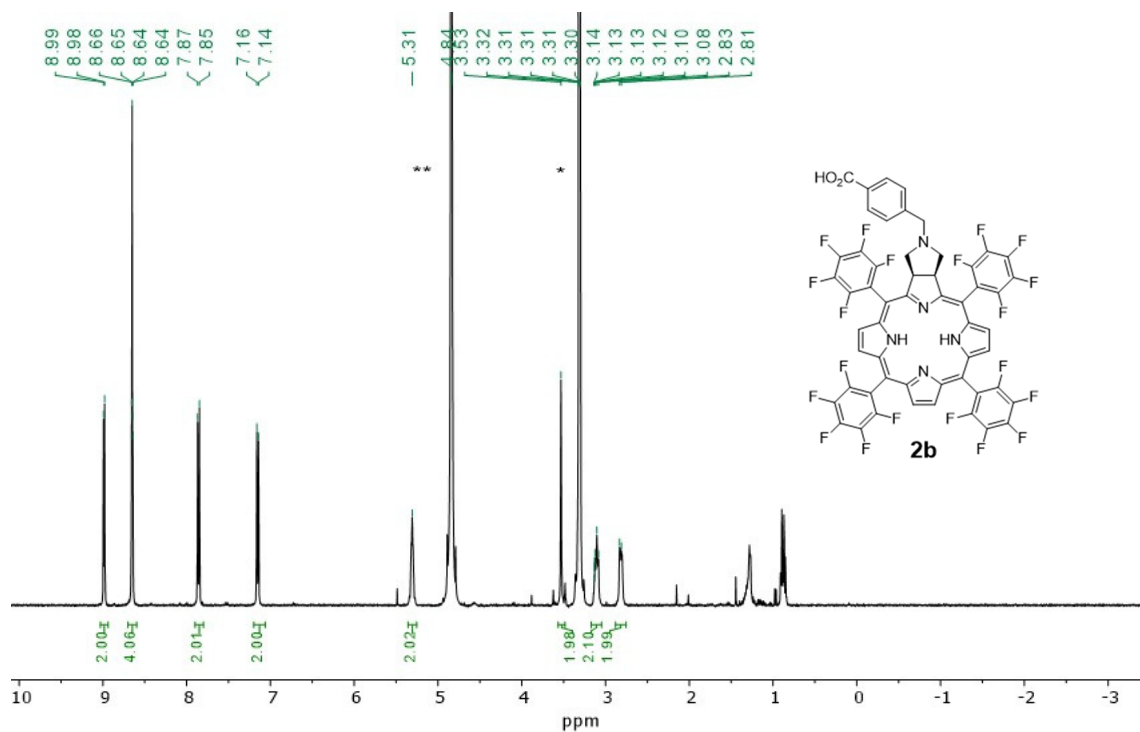

**Figure S 10.**  $^1\text{H}$  NMR spectrum (400.14 MHz,  $\text{CD}_3\text{OD}$ ) of **2b** (\* $\text{CD}_3\text{OD}$  ; \*\*water).



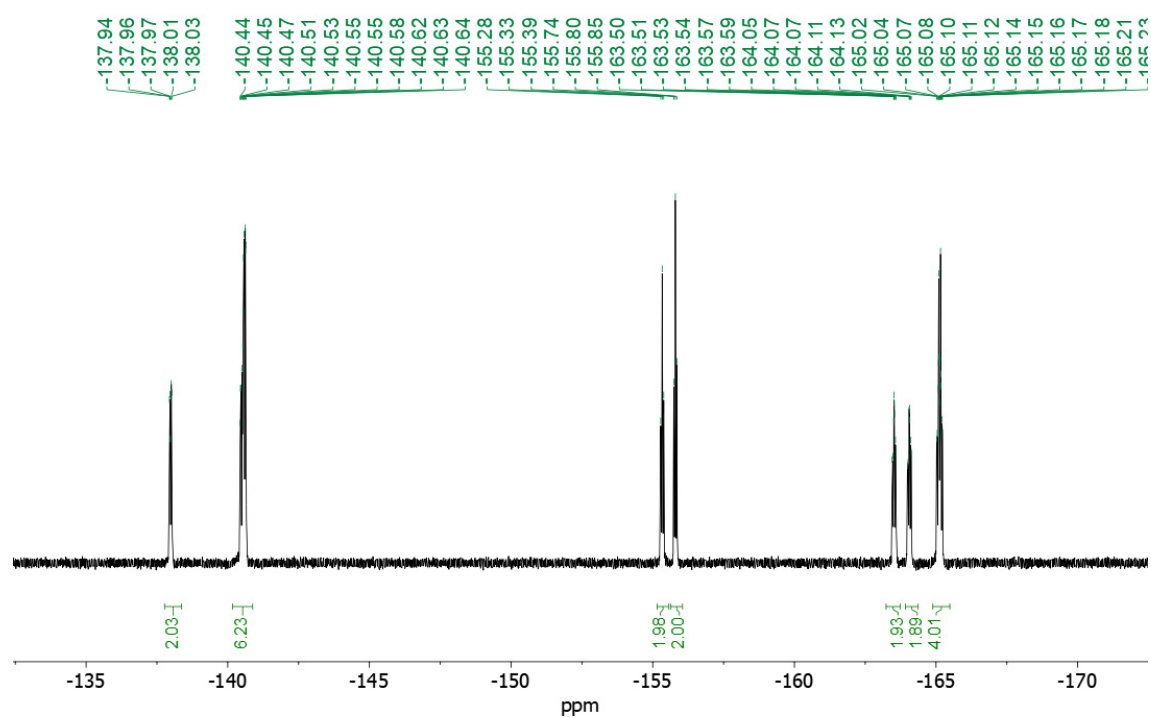

**Figure S 11.** <sup>19</sup>F NMR spectrum (376.48 MHz, CD<sub>3</sub>OD) of **2b**.

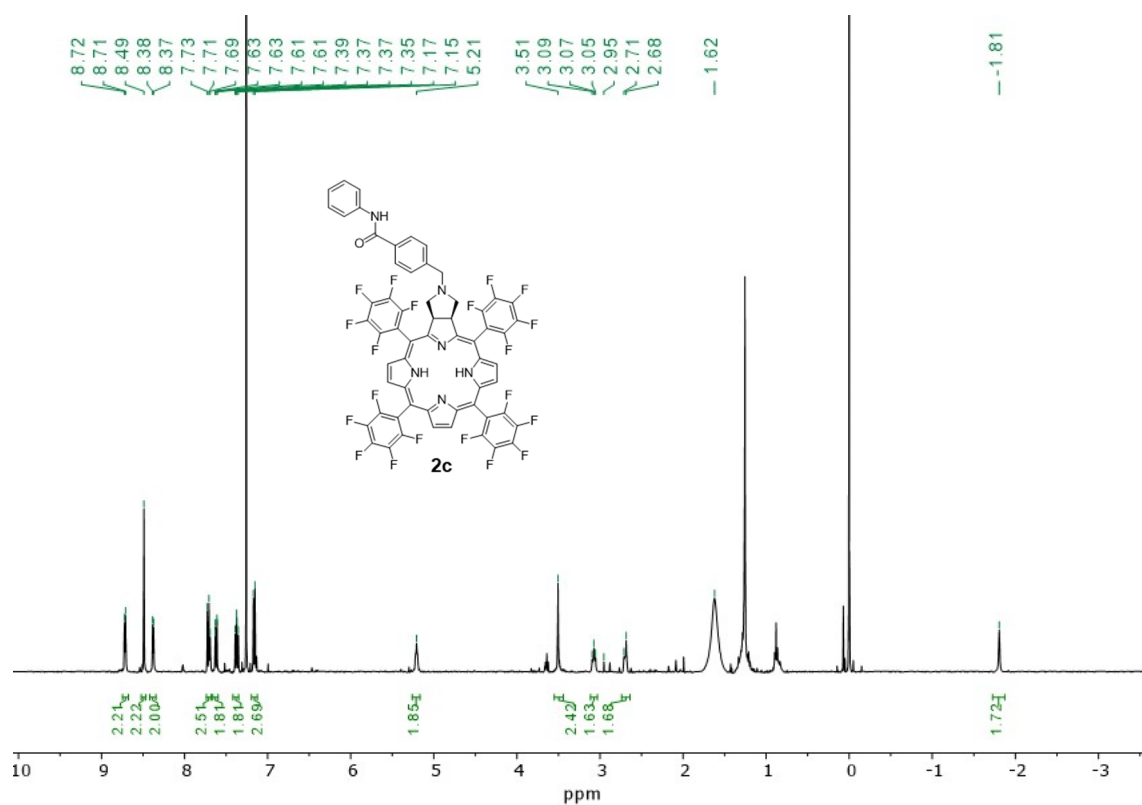

Figure S 12. <sup>1</sup>H NMR spectrum (400.14 MHz, CDCl<sub>3</sub>) of **2c**.

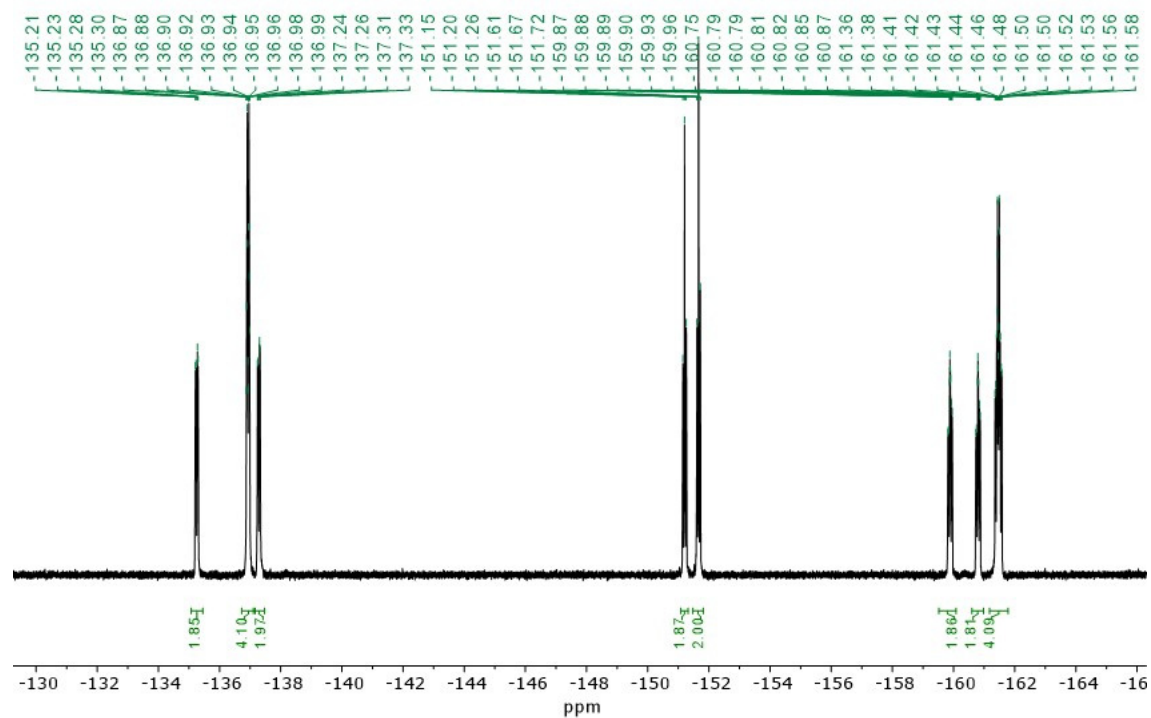

Figure S 13. <sup>19</sup>F NMR spectrum (376.48 MHz, CDCl<sub>3</sub>) of **2c**.

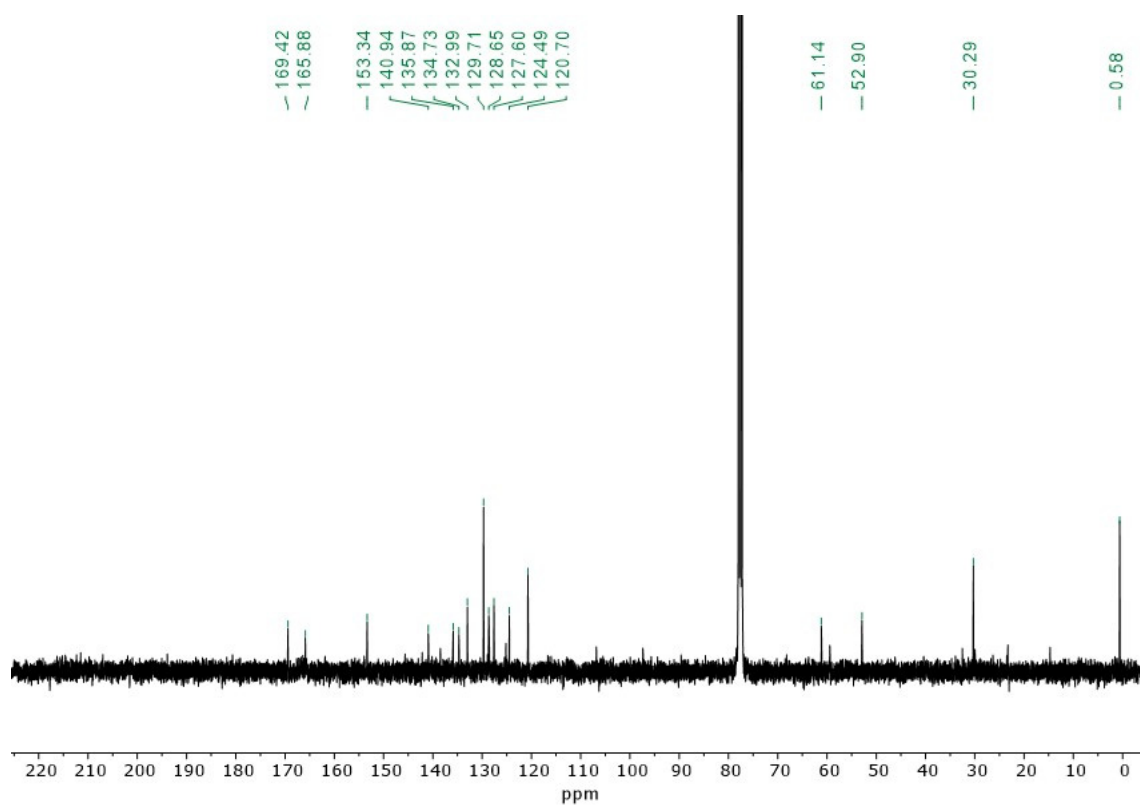

**Figure S 14.**  $^{13}\text{C}$  NMR spectrum (100.62 MHz,  $\text{CDCl}_3$ ) of **2c**.

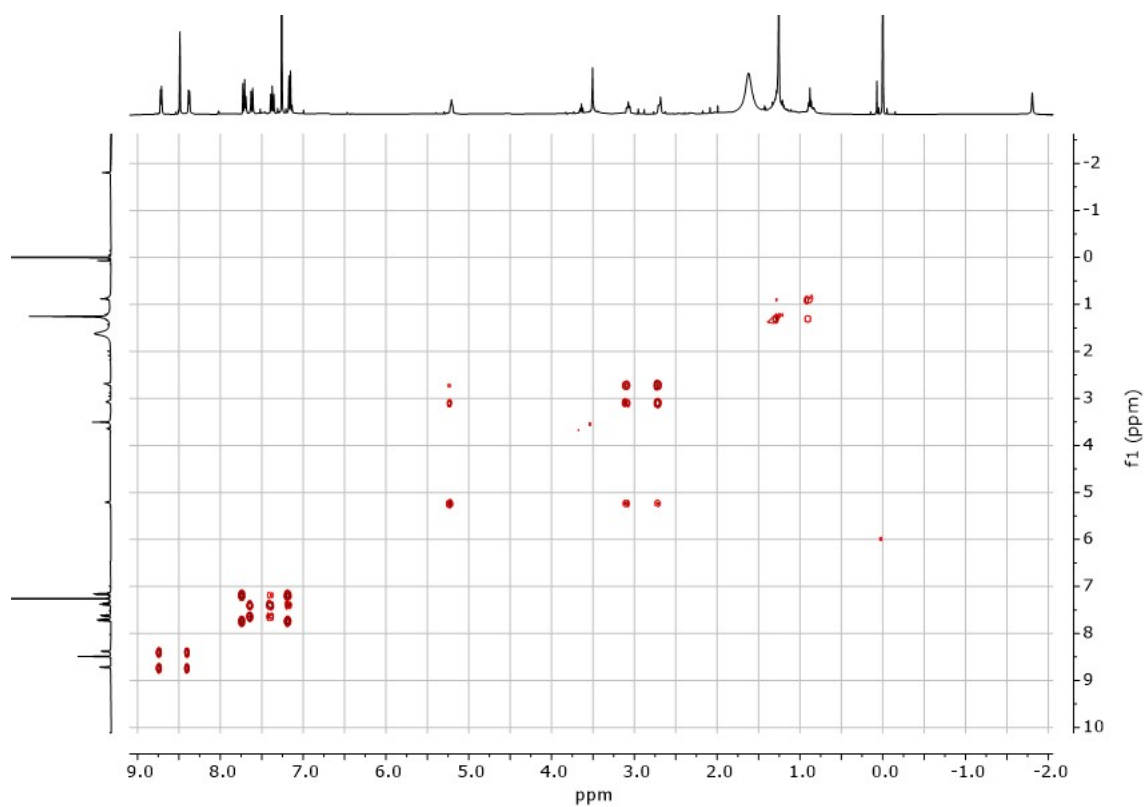

**Figure S 15.** COSY spectrum of **2c**.

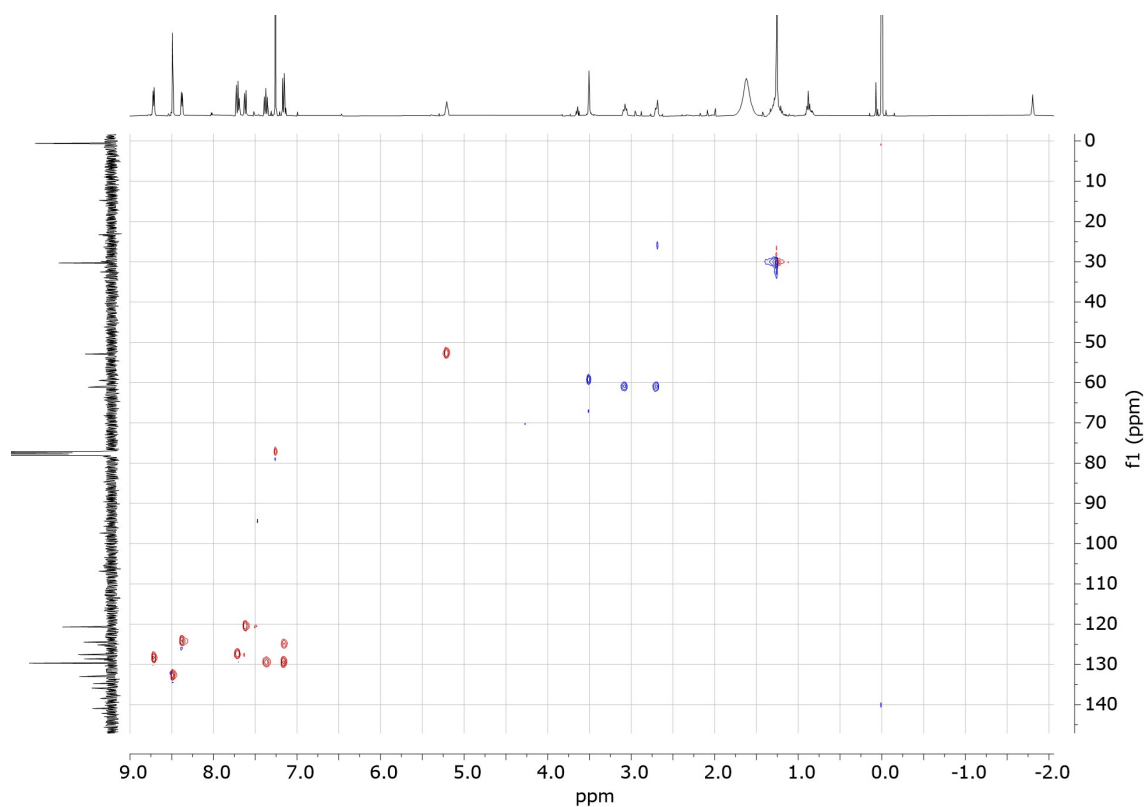

Figure S 16. HSQC spectrum of **2c**.

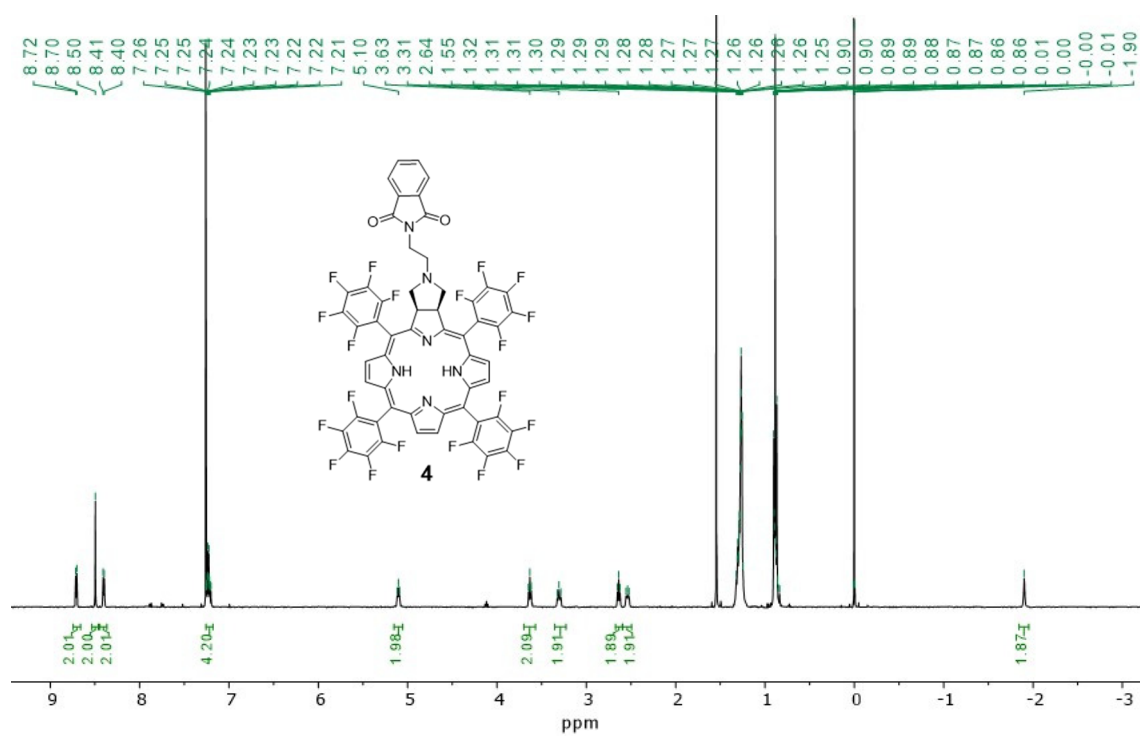

Figure S 17.  $^1\text{H}$  NMR (400.14 MHz,  $\text{CDCl}_3$ ) spectrum of **4**.

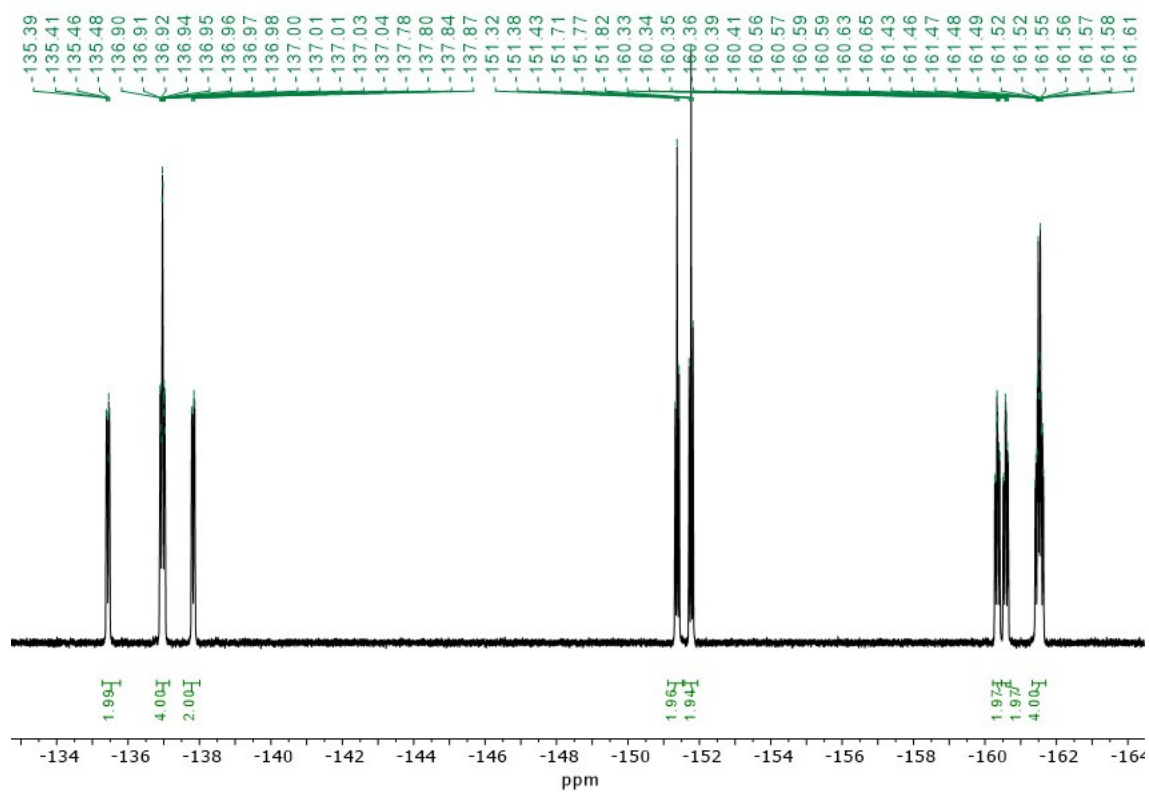

**Figure S 18.** <sup>19</sup>F NMR (376.48 MHz, CD<sub>3</sub>Cl) spectrum of 4.

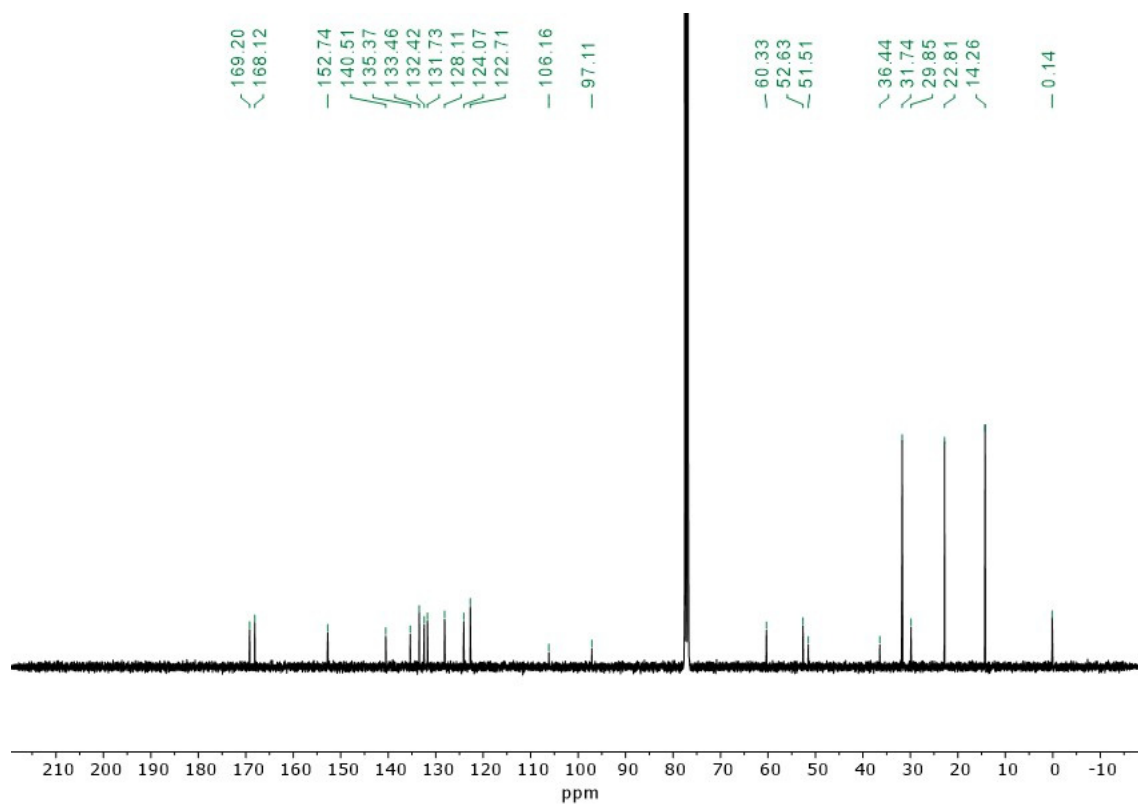

**Figure S 19.** <sup>13</sup>C NMR spectrum (100.62 MHz, CDCl<sub>3</sub>) of 4.

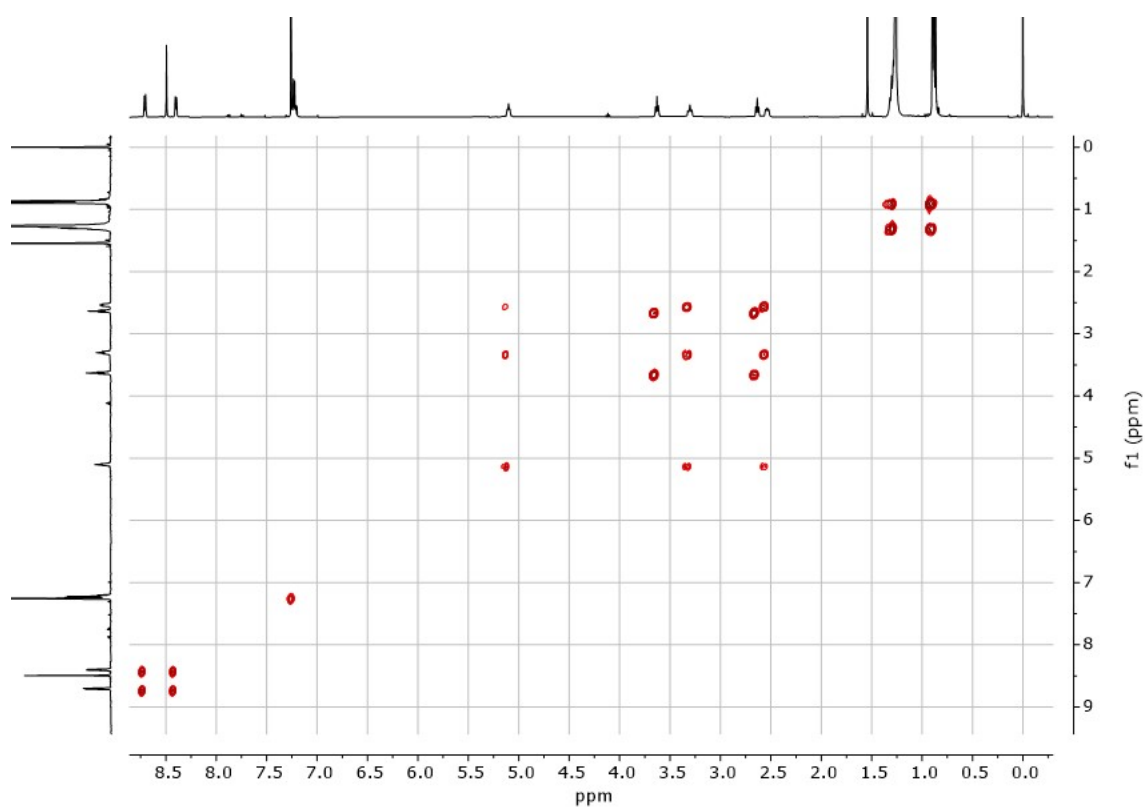

**Figure S 20.** COSY spectrum of 4.

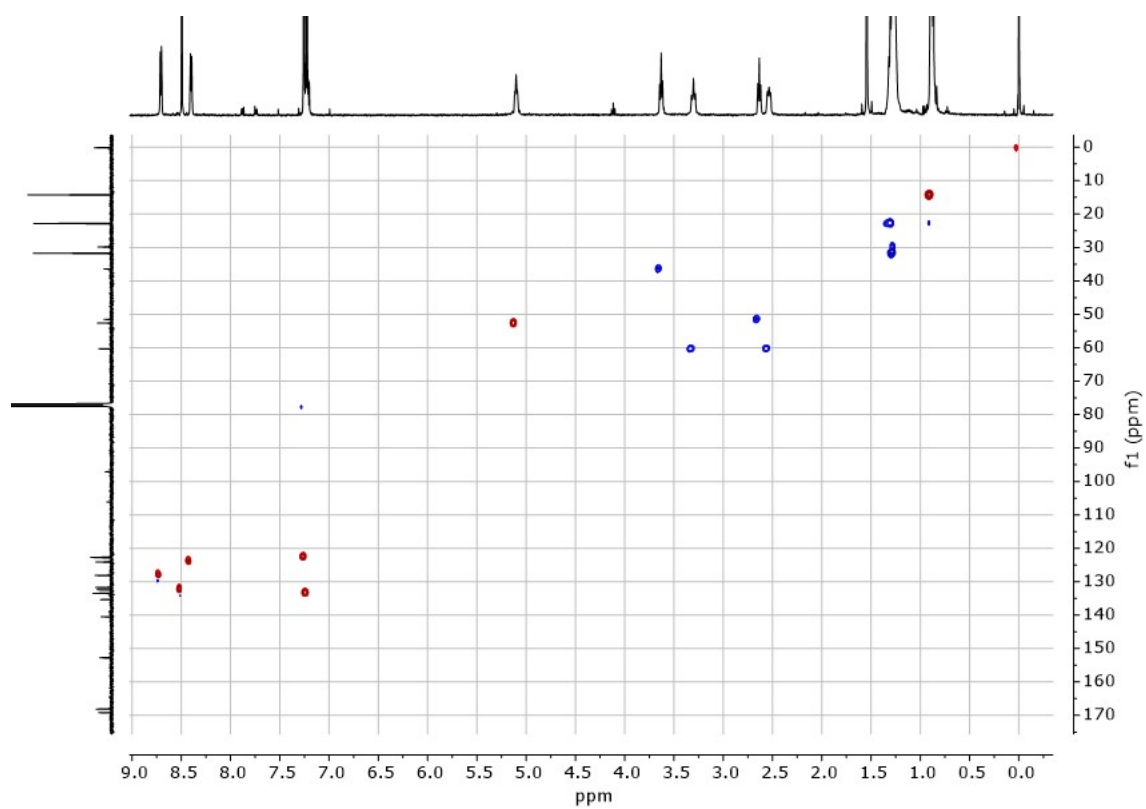

**Figure S 21.** HSQC spectrum of 4.

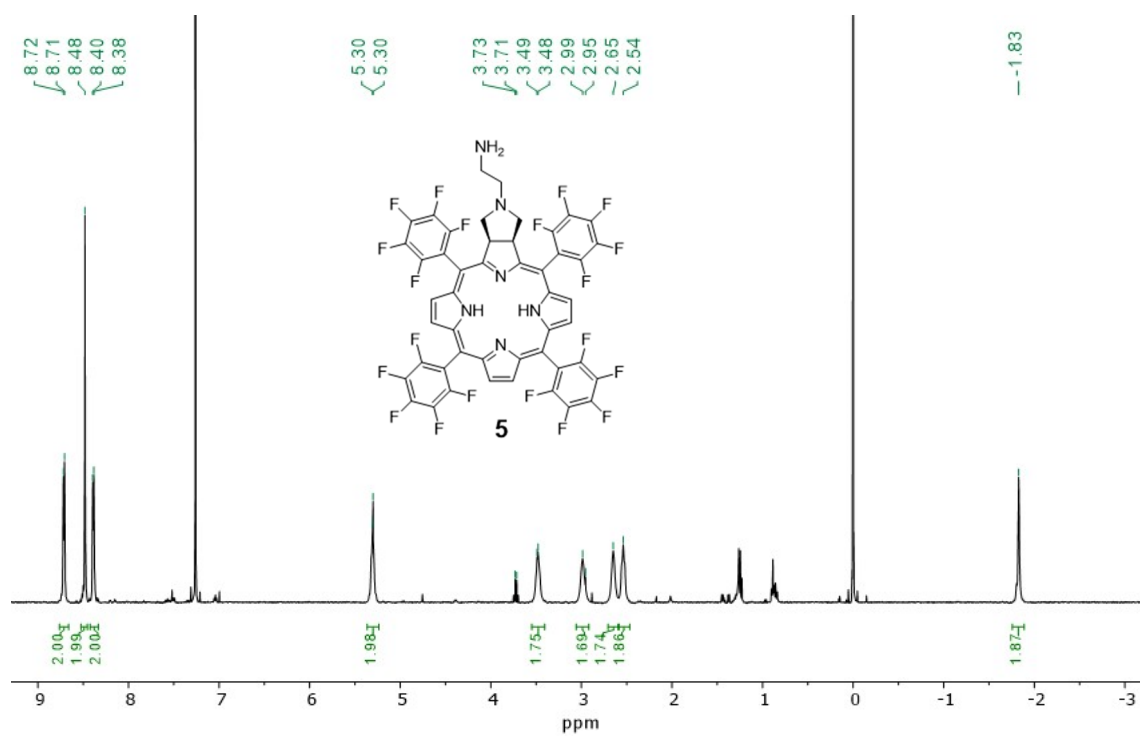

**Figure S 22.** <sup>1</sup>H NMR spectrum (400.14 MHz, CDCl<sub>3</sub>) of **5**.

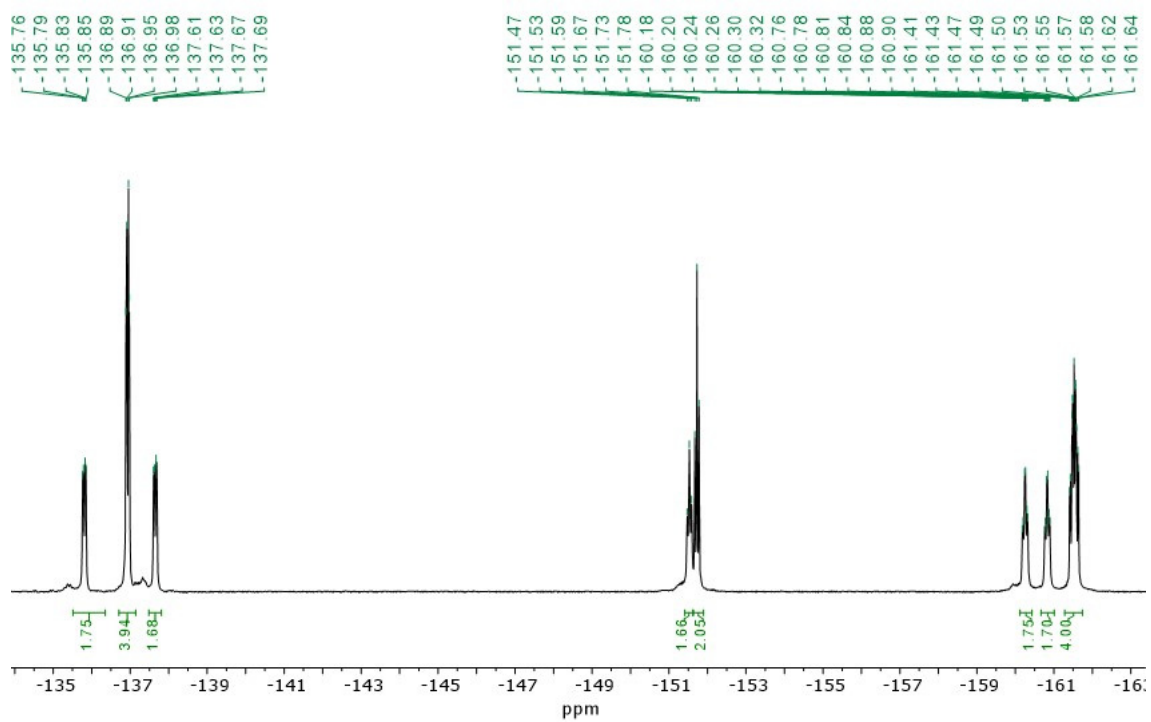

**Figure S 23.** <sup>19</sup>F NMR spectrum (376.48 MHz, CDCl<sub>3</sub>) of **5**.

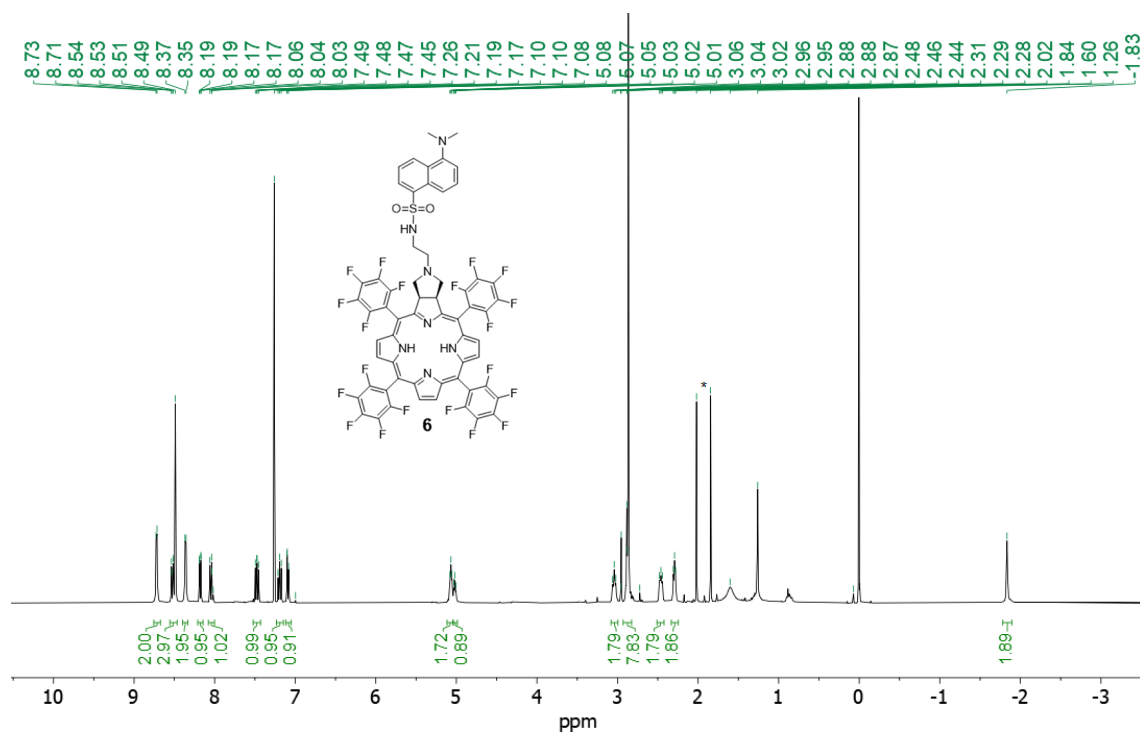

**Figure S 24.** <sup>1</sup>H NMR spectrum (400.14 MHz, CDCl<sub>3</sub>) of **6** (\*impurities).

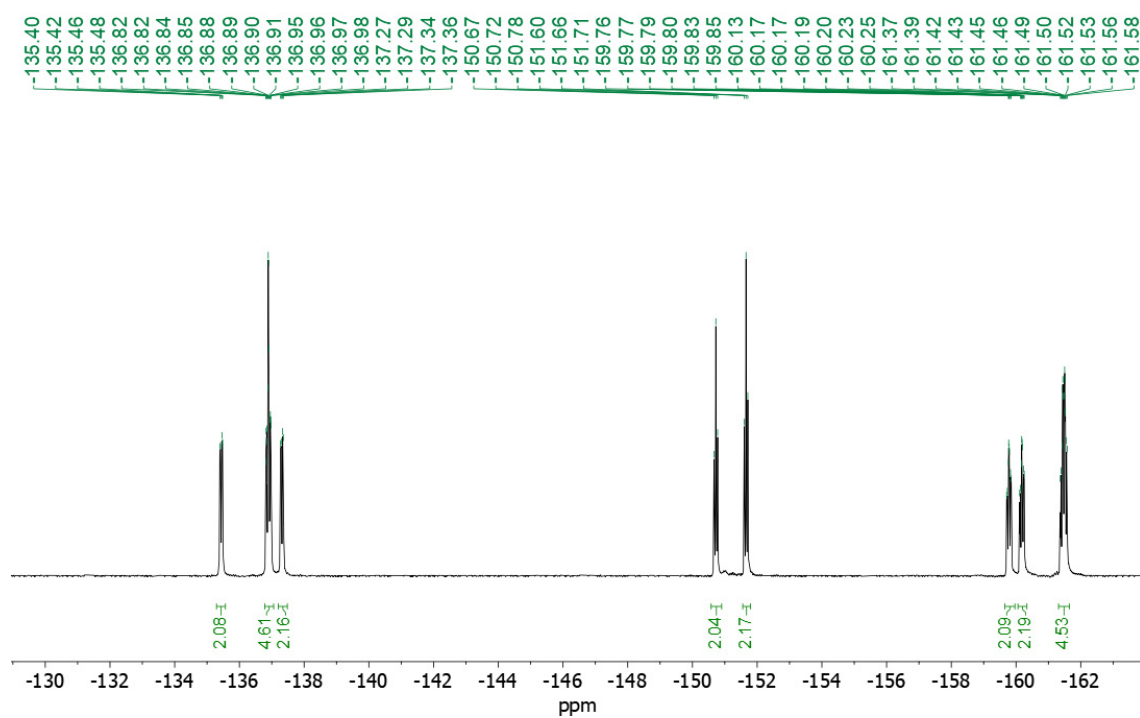

**Figure S 25.** <sup>19</sup>F NMR spectrum (376.48 MHz, CDCl<sub>3</sub>) of **6**.



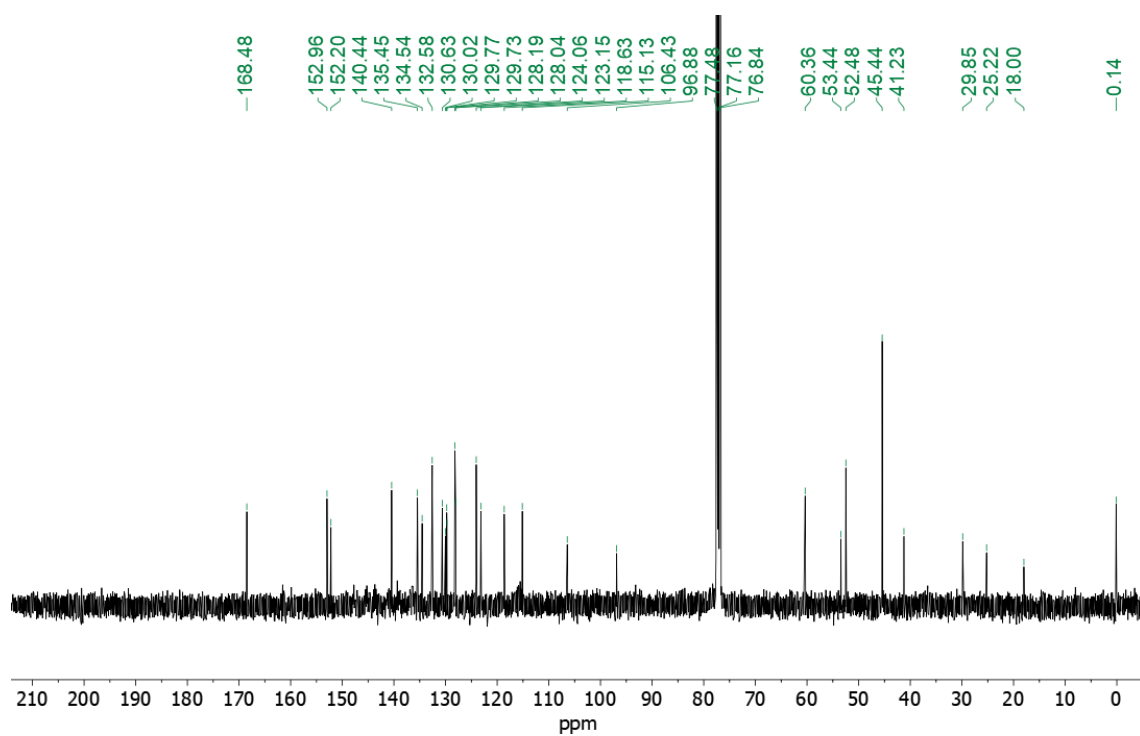

**Figure S 26.**  $^{13}\text{C}$  NMR spectrum (100.62 MHz,  $\text{CDCl}_3$ ) of **6**.

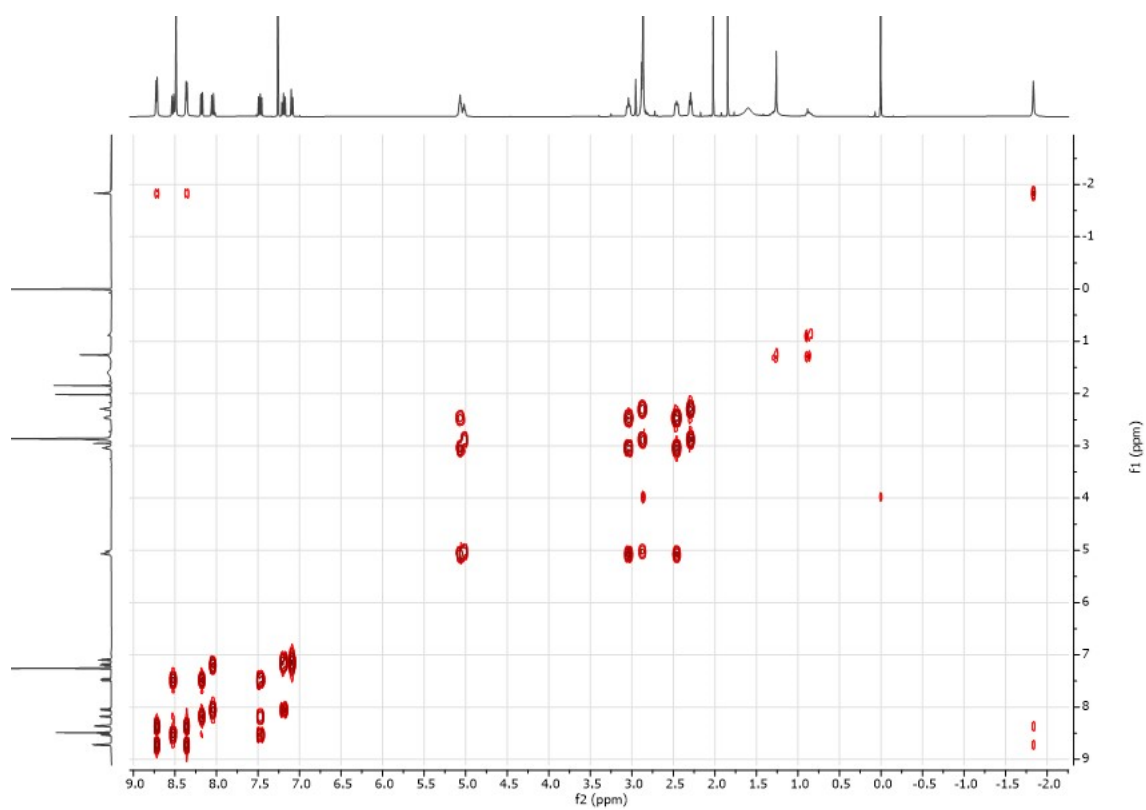

**Figure S 27.** COSY spectrum of **6**.

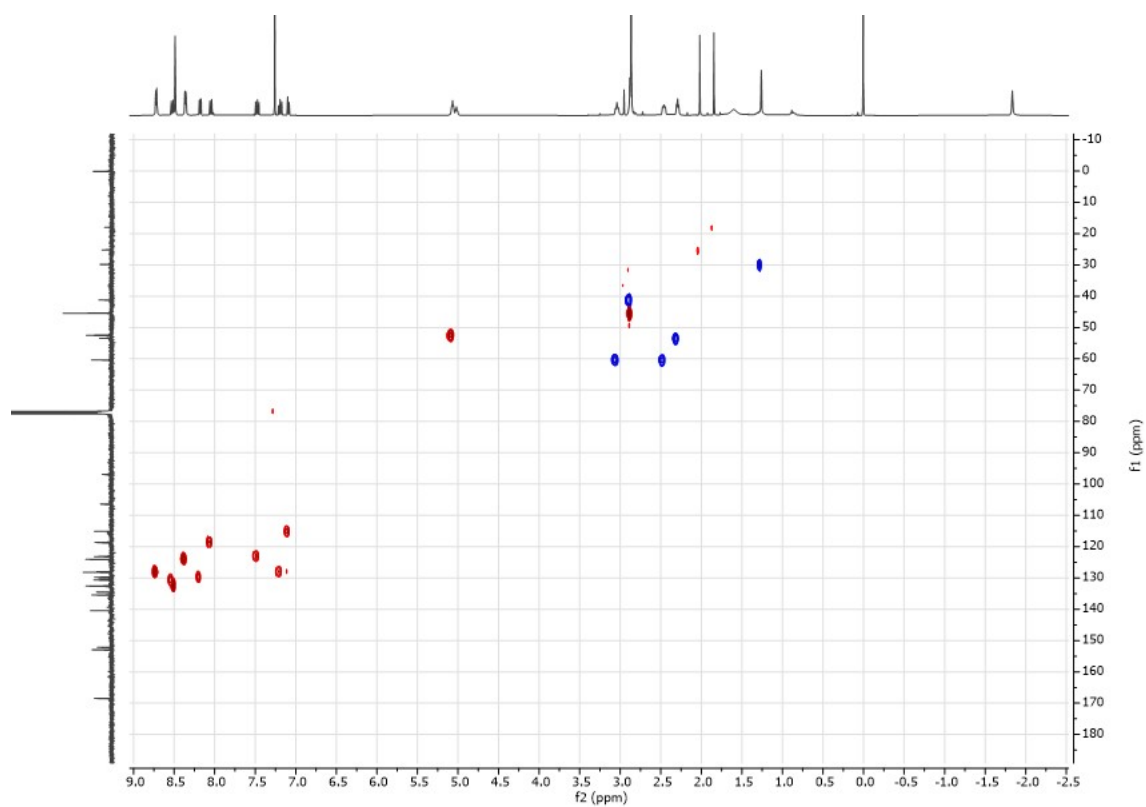

**Figure S 28.** HSQC spectrum of 6.

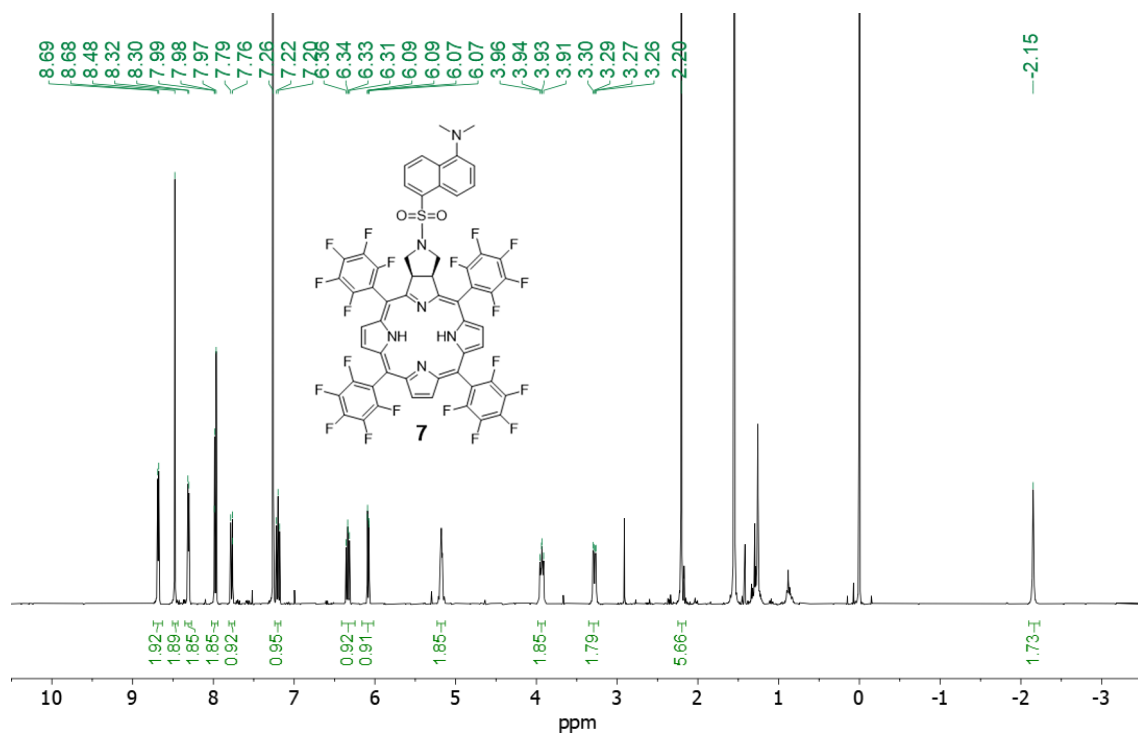

**Figure S 29.**  $^1\text{H}$  NMR spectrum (400.14 MHz,  $\text{CDCl}_3$ ) of 7.

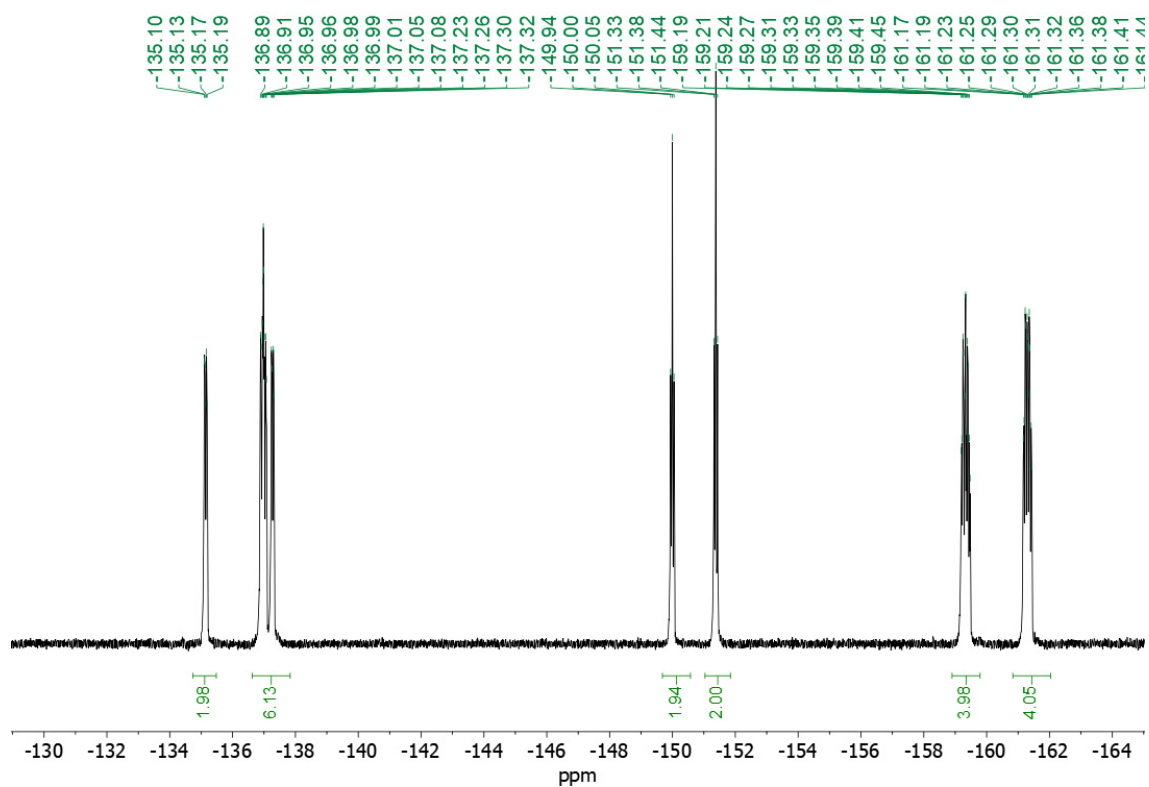

Figure S 30. <sup>19</sup>F NMR spectrum (376.48 MHz, CD<sub>3</sub>Cl) of 7.

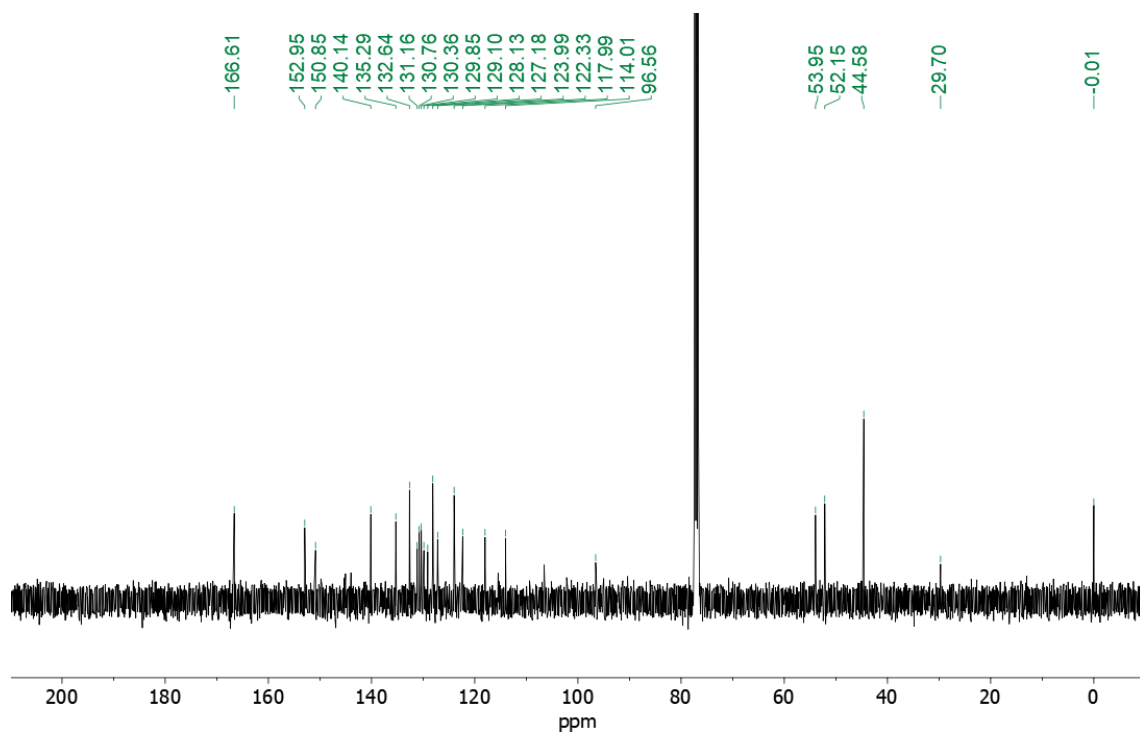

Figure S 31. <sup>13</sup>C NMR spectrum (101 MHz, CDCl<sub>3</sub>) of 7.

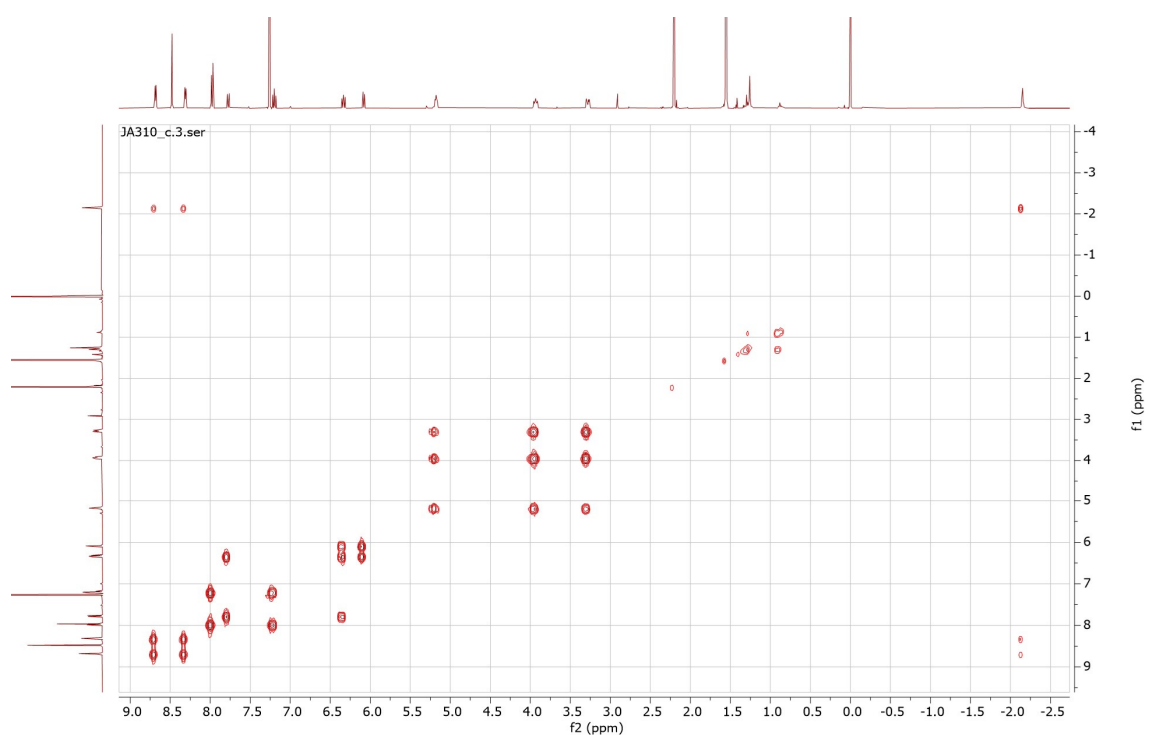

**Figure S 32.** COSY spectrum of 7.

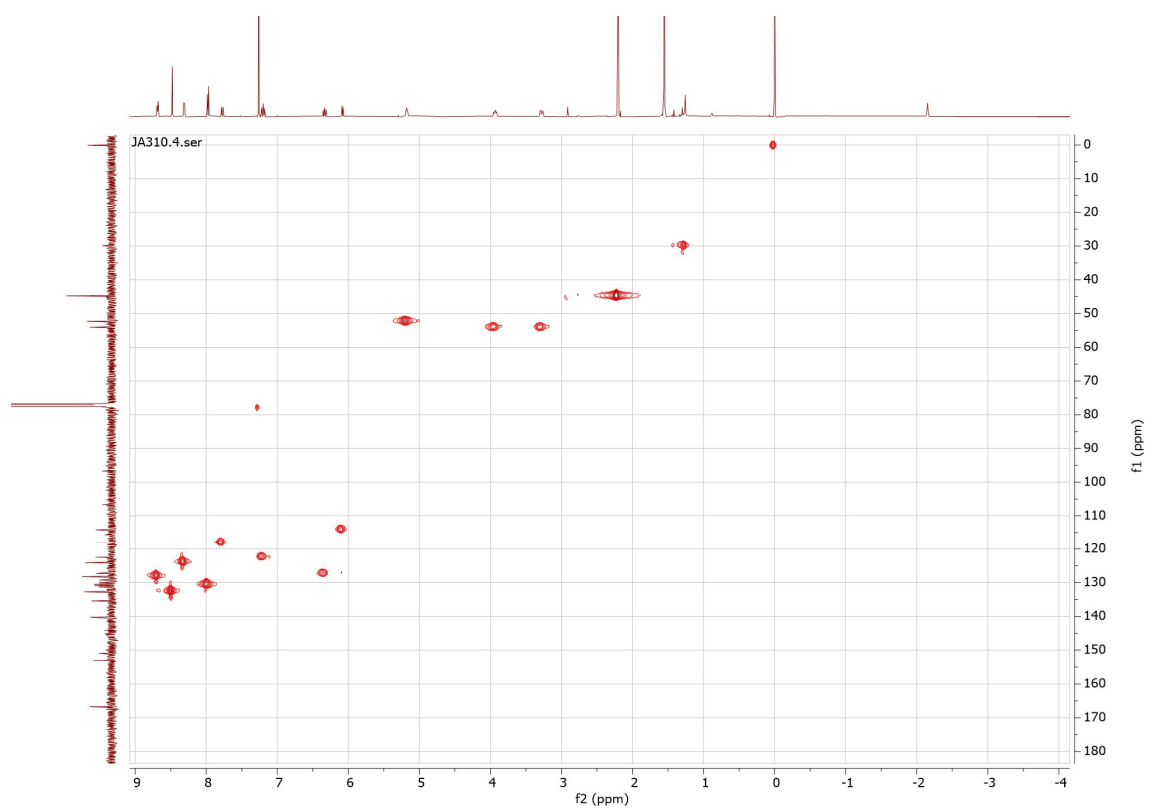

**Figure S 33.** HSQC spectrum of 7.

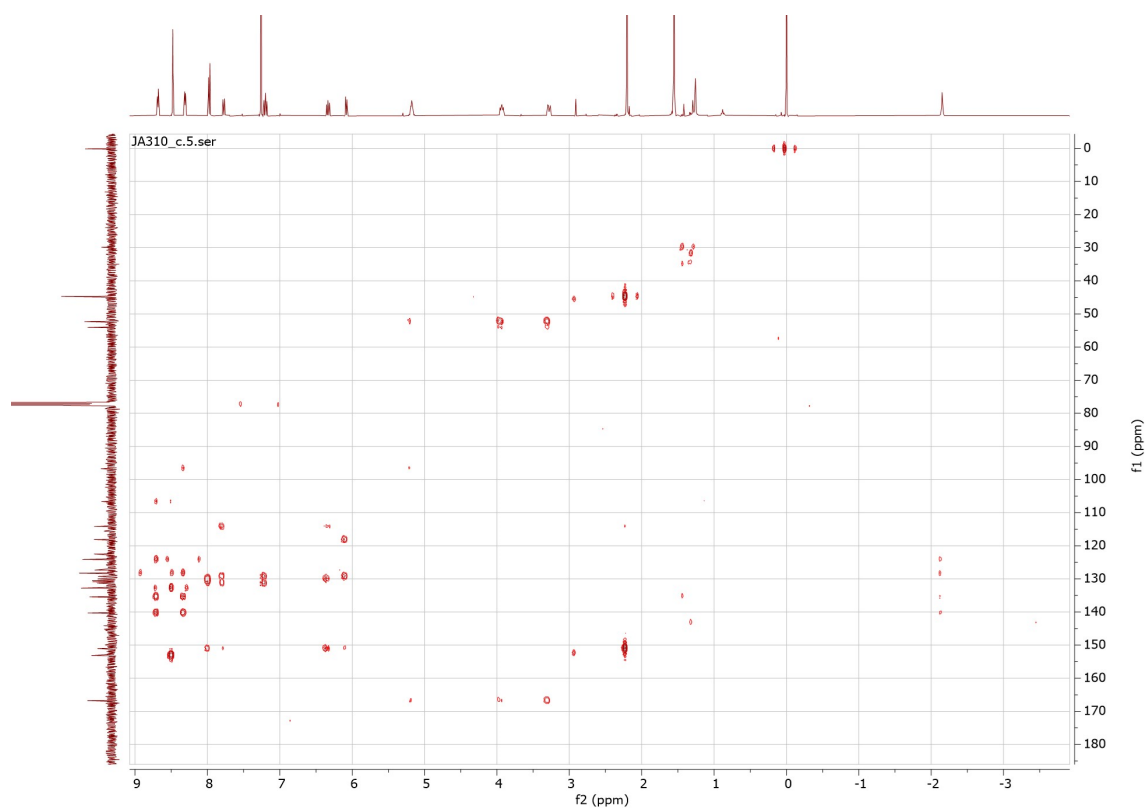

**Figure S 34.** HMBC spectrum of **7**.

## Mass spectrometry

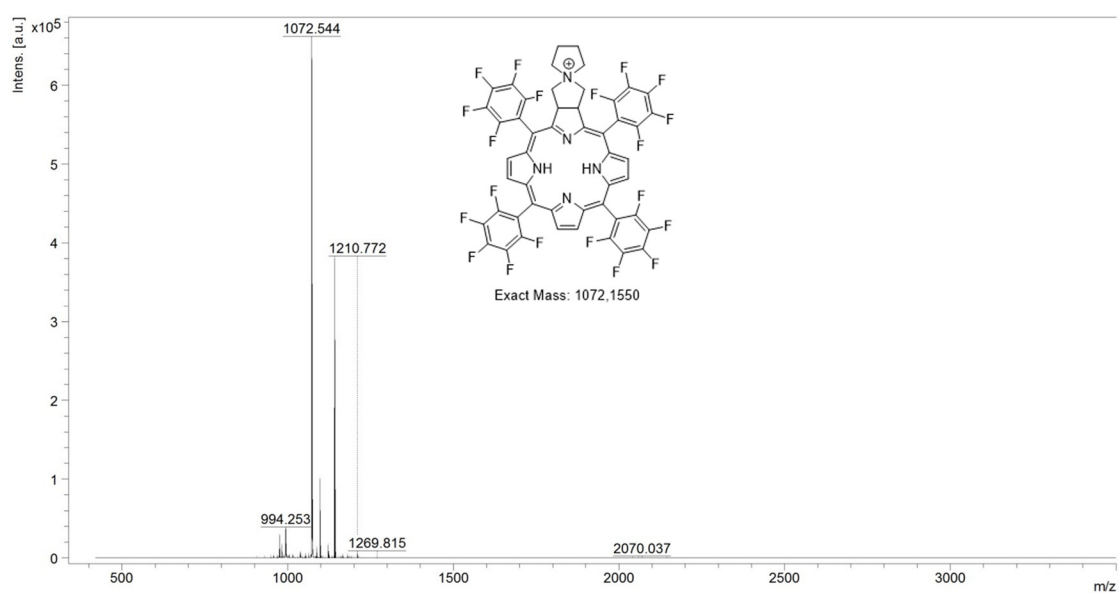

**Figure S 35.** MALDI-TOF spectrum of **3**.

CN-BenzCOOH 1#1-70 RT: 0.00-1.00 AV: 70 NL: 5.67E7  
F: FTMS + p ESI Full ms [100.00-2000.00]

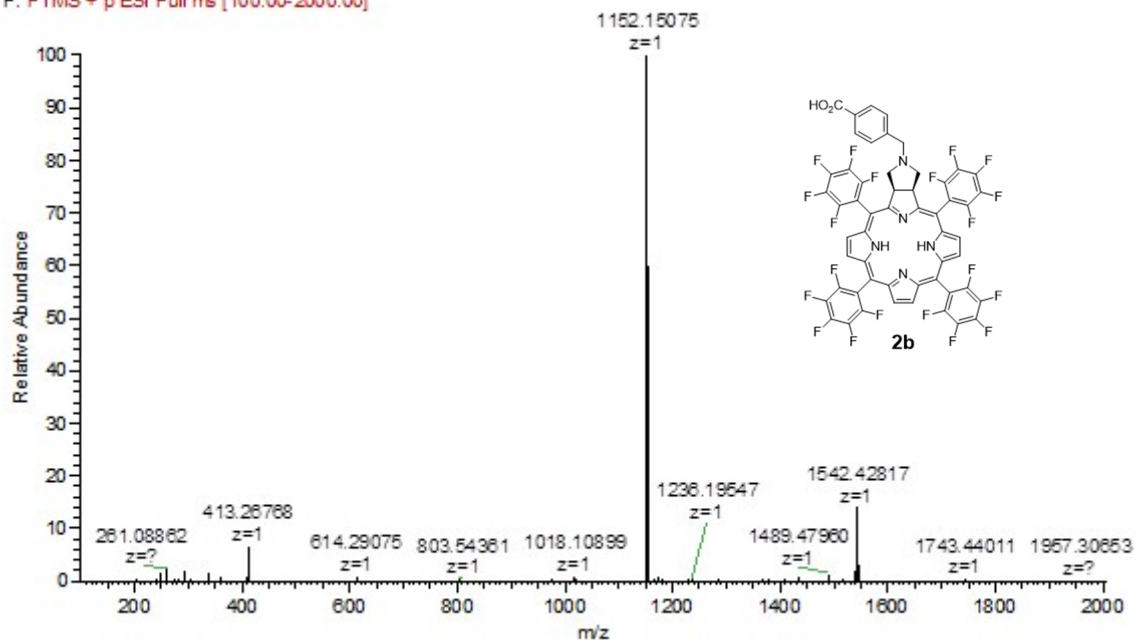

Figure S 36. ESI-MS spectrum of **2b**.

CN-BzAc7-A 496-99 RT: 2.082.11 AV: 2 NL: 3.03E5  
F: FTMS + p ESI Full ms [200.00-2000.00]

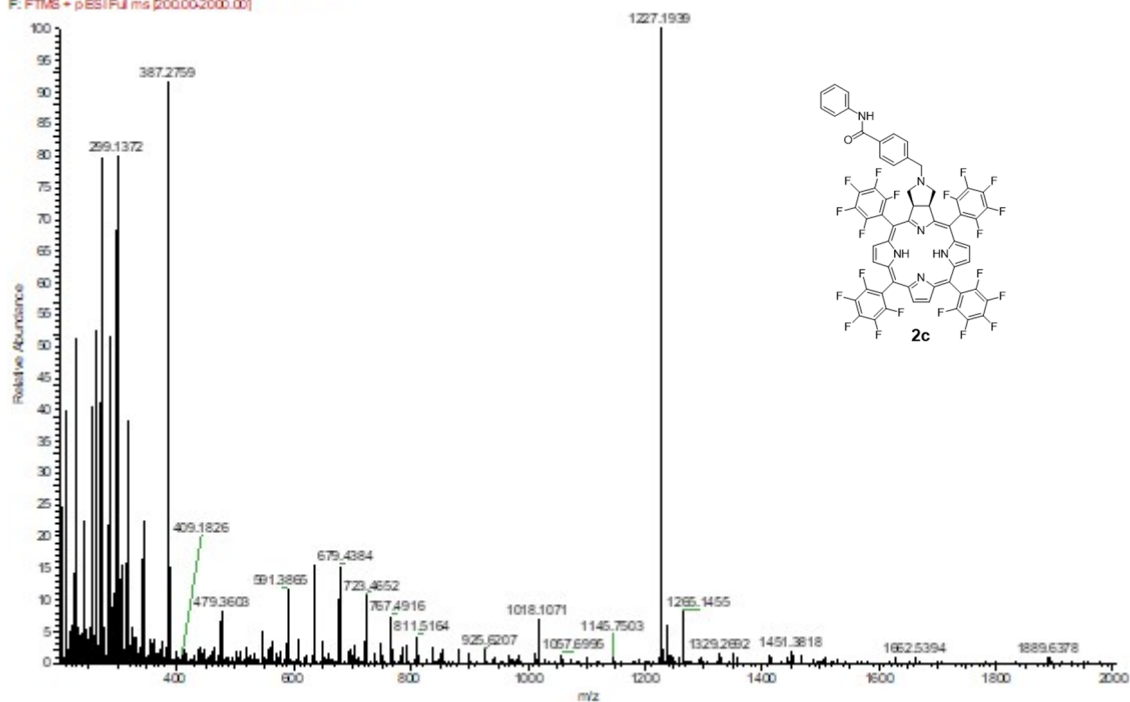

Figure S 37. ESI-MS full spectrum of **2c**.

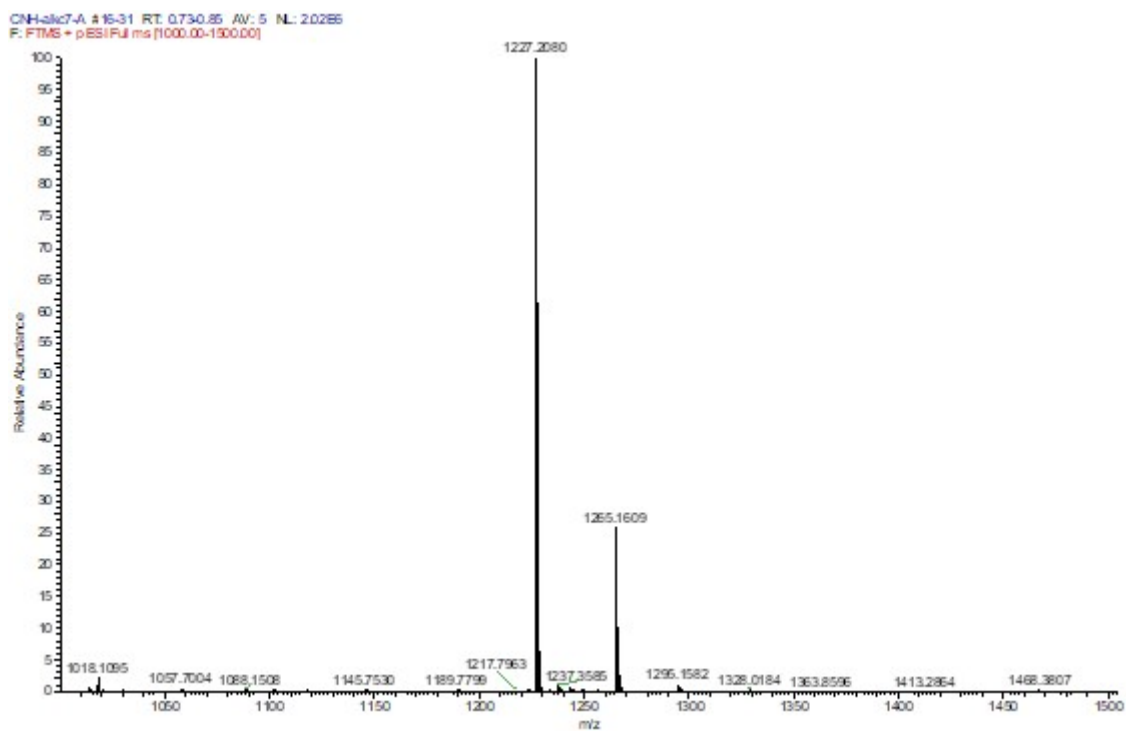

Figure S 38. ESI-MS spectrum of chlorin **2c** (1000.00-1500.00 Da).

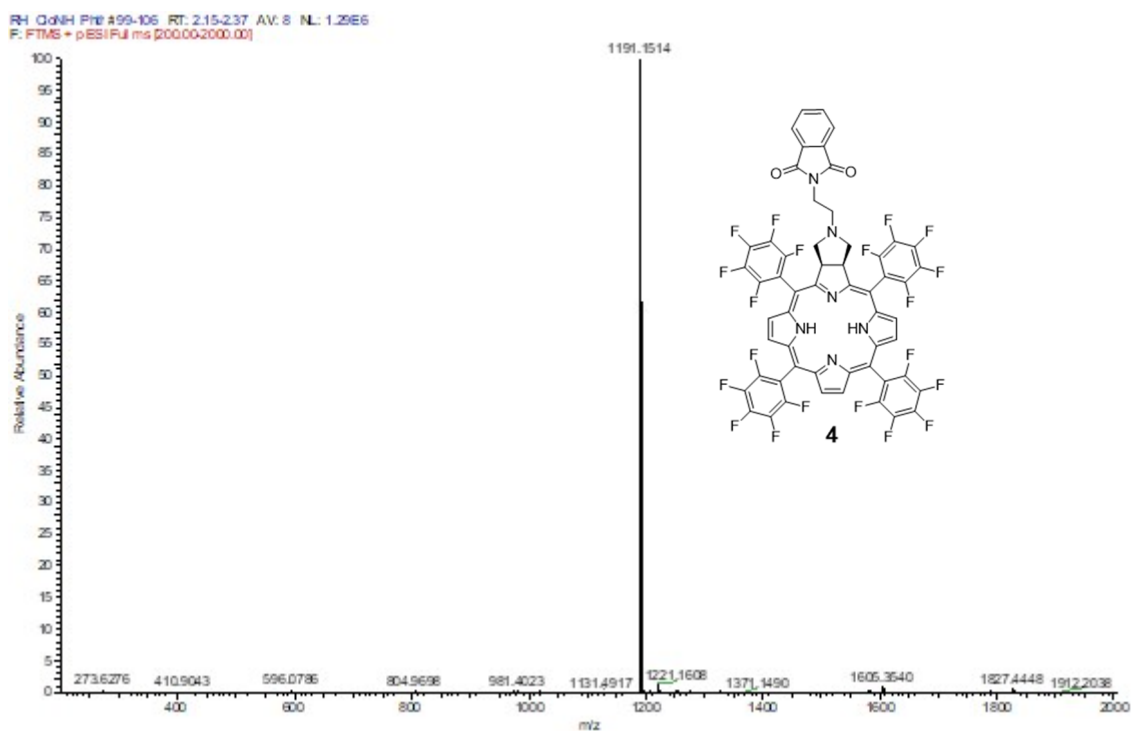

Figure S 39. ESI-MS spectrum of chlorin **4**.

200915\_JA106\_1 #1-120 RT: 0.00-1.99 AV: 120 NL: 1.68E8  
T: FTMS + p ESI Full ms [100.00-2000.00]

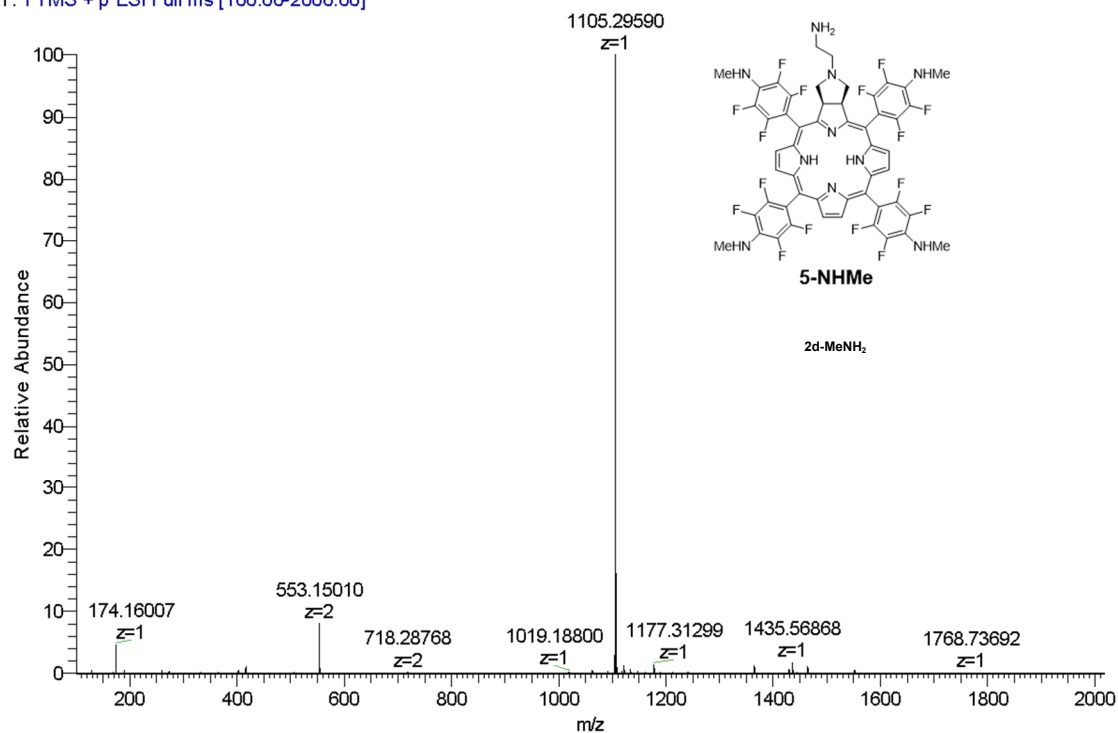

**Figure S 40.** ESI-MS spectrum of methylamine tetrasubstituted chlorin **5-MeNH<sub>2</sub>**

200915\_JA83\_1 #1-74 RT: 0.02-2.00 AV: 74 NL: 8.67E7  
T: FTMS + p ESI Full ms [100.00-2000.00]

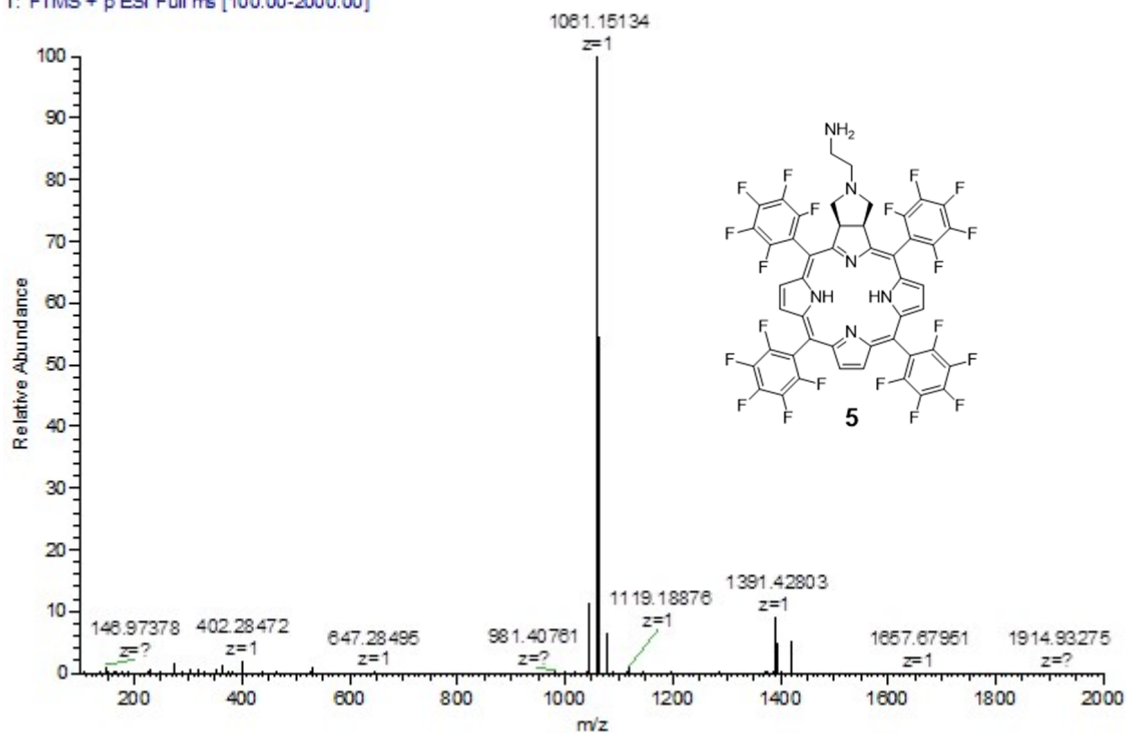

**Figure S 41.** ESI-MS spectrum of **5**.



JA140 1#1-25 RT: 0.00-1.99 AV: 25 NL: 7.19E6  
T: FTMS + p ESI Full ms [150.00-2000.00]

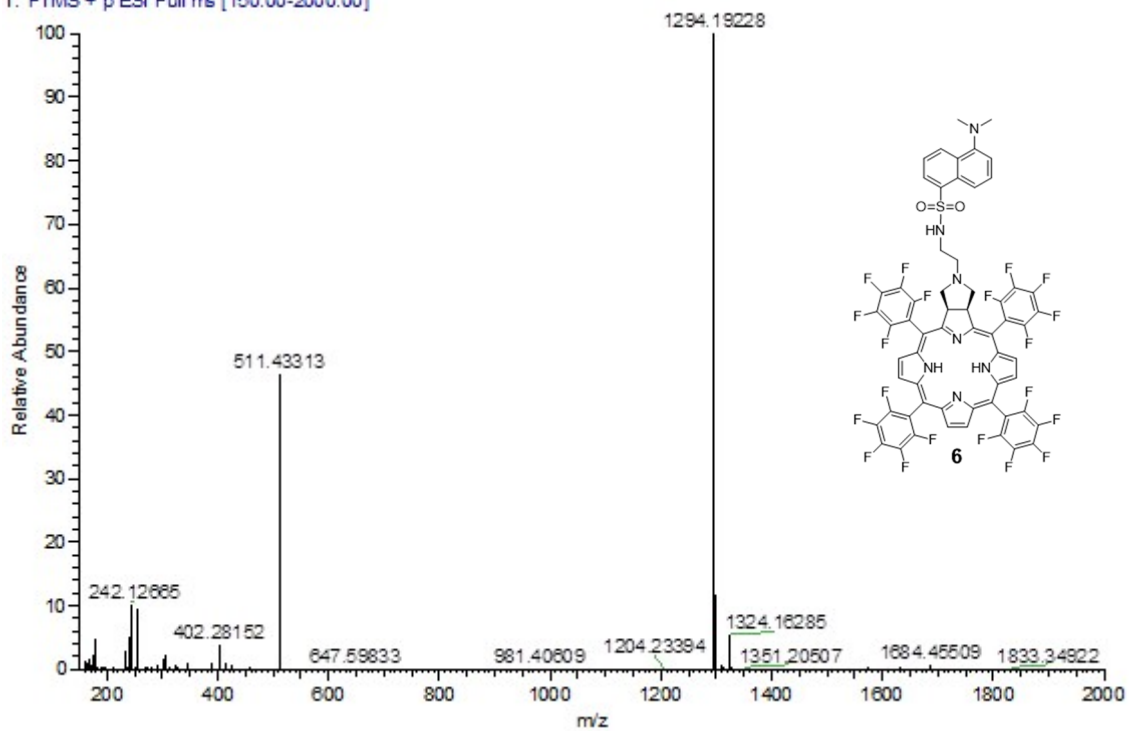

Figure S 42. ESI-MS spectrum of **6**.

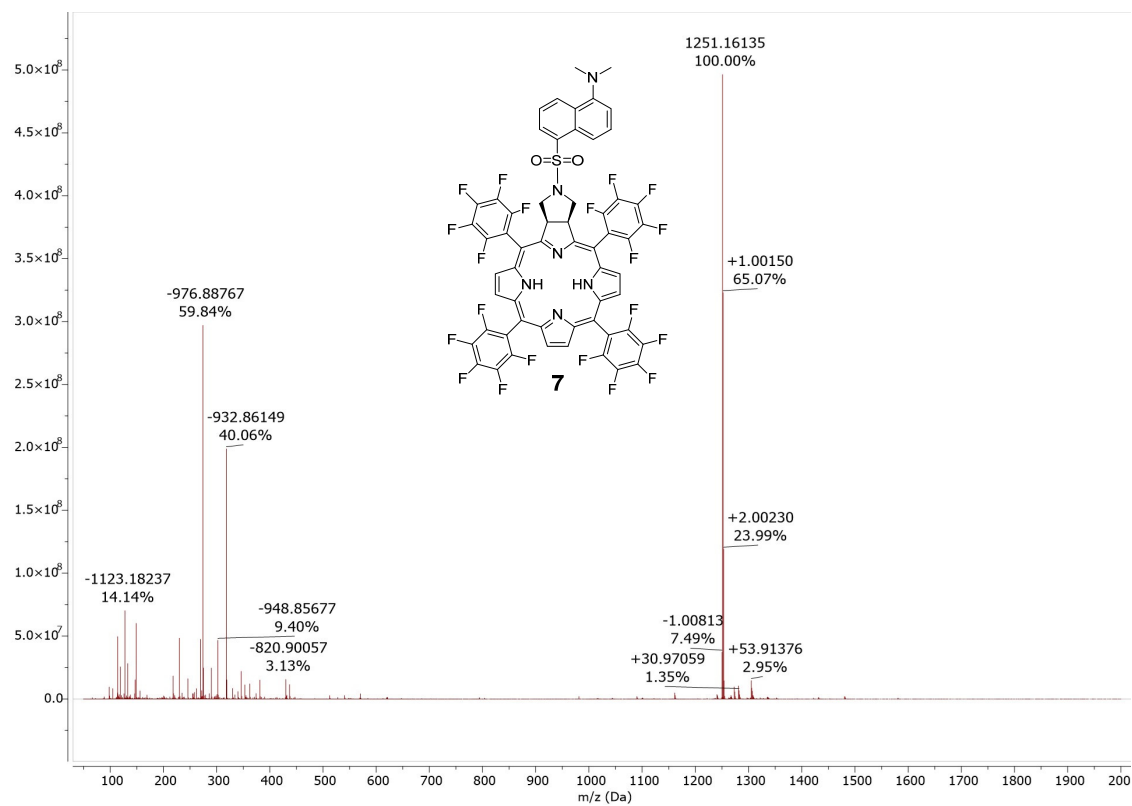

Figure S 43. ESI-MS spectrum of **7**.

## UV-Vis and fluorescence spectroscopy

**Table S 2.** Spectral data for dansyl-ethylamine **dansylNH(CH<sub>2</sub>)<sub>2</sub>NH<sub>2</sub>**, chlorin ethylamine **5** and chlorin–dansyl conjugates **6** and **7** in DMF

|                                                           | Absorption                                                                                    |        |        | Emission                                |
|-----------------------------------------------------------|-----------------------------------------------------------------------------------------------|--------|--------|-----------------------------------------|
|                                                           | $\epsilon$ at $\lambda_{\text{max}}$ ( $\times 10^3$ / $\text{M}^{-1} \cdot \text{cm}^{-1}$ ) |        |        | $\lambda_{\text{max, nm}}$ ( $\phi_F$ ) |
|                                                           | 338 nm                                                                                        | 405 nm | 650 nm |                                         |
| <b>dansylNH(CH<sub>2</sub>)<sub>2</sub>NH<sub>2</sub></b> | 7.64                                                                                          | -      | -      | 512 (n.d.)                              |
| <b>5</b>                                                  | 19.1                                                                                          | 153    | 43     | 655 (0.147)                             |
| <b>6</b>                                                  | 20.3                                                                                          | 144    | 37     | 655 (0.188)                             |
| <b>7</b>                                                  | 18.2                                                                                          | 130    | 34     | 655 (0.123)                             |

n.d. = not determined

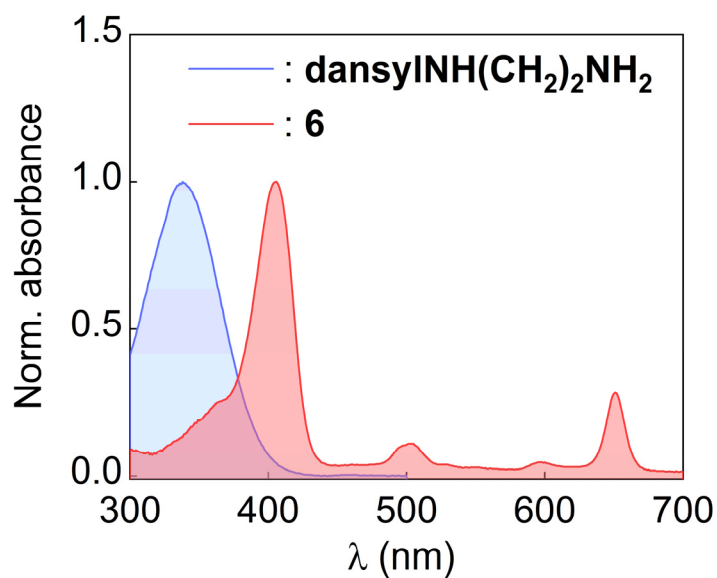

**Figure S 44.** Absorption spectrum of ethylamine functionalized dansyl (**dansylNH(CH<sub>2</sub>)<sub>2</sub>NH<sub>2</sub>**) and chlorin–dansyl dyad **6**, in DMF.

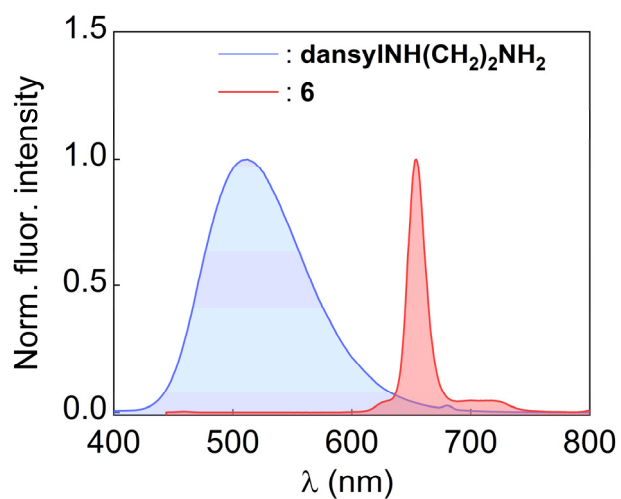

**Figure S 45.** Emission spectrum of ethylamine functionalized dansyl (**dansylNH(CH<sub>2</sub>)<sub>2</sub>NH<sub>2</sub>**) and chlorin–dansyl dyad **6**, in DMF.

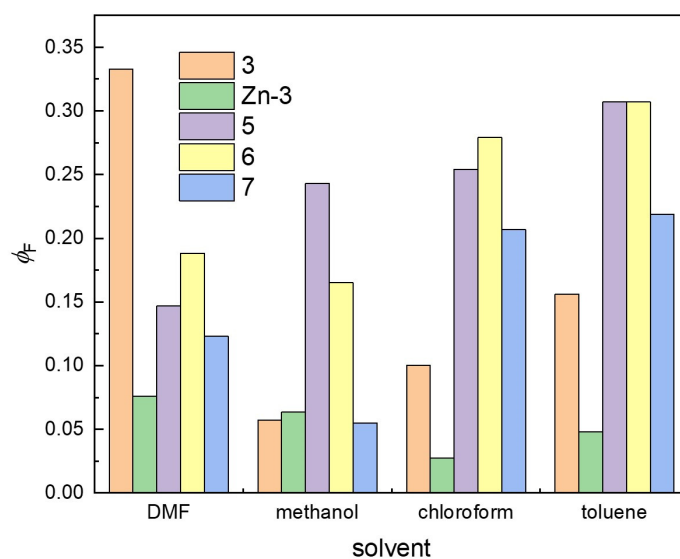

**Figure S 46.** Fluorescence quantum yield values for chlorins **3**, **Zn-3**, **5**, and chlorin–dyads **6** and **7** in DMF, methanol, chloroform, and toluene.
